# Supplementary material for: Characterization of convergent thickening, a major convergence force producing morphogenic movement in amphibians
Source: eLife. 2022 Apr 11;11:e57642. doi: 10.7554/eLife.57642 (PMC9064293; doi:10.7554/eLife.57642)
Supplement: Figure 2—source data 1. [file elife-57642-fig2-data1.xlsx]

## Sheet: 080520 V&D giants 1.results
	Source Data for Figure 2C
		Standard Giant
			Relative convergence
			D giant Vt/V0 avg	D giant Lt/L0 avg	D giant Dt/D0 avg
		Mean Time (hr)	Ventral	Lateral	Dorsal	V std err	L std err	D std err	n
		-0.4	1	1	1	0	0	0	3
		-0.0267333	0.964237	0.949334	0.942893	0.0152613	0.0102976	0.00781183	5
		0.453267	0.935524	0.929613	0.912413	0.0127572	0.0182729	0.0184174	5
		1.45327	0.844525	0.840669	0.797352	0.0146756	0.0141509	0.0269486	5
		2.45327	0.747322	0.728273	0.738001	0.0372774	0.0267719	0.0220864	5
	Source Data for Figure 2D
		Ventral giants means
			Relative convergence
		Time (h)	Dorsal	Lateral	Ventral	SE dorsal	SE lateral	SE ventral	n
		-0.416667	1.00011	0.998902	0.998614	0	0	0	4
		0.0458333	0.929203	0.9342	0.933724	0.02347	0.0149119	0.00988495	4
		0.526667	0.878314	0.882612	0.905209	0.0293793	0.0332718	0.0178762	5
		1.52667	0.762904	0.79548	0.776856	0.044991	0.0436503	0.0335091	5
		2.52667	0.662884	0.698196	0.675778	0.0400492	0.0466764	0.0449434	5
	Source Data for Figure 2E
		Ventralized giants
		n = 3
		time (h)	Relative convergence	SE
		-1	1	0
		-0.05	0.905303	0.0239599
		0.933333	0.818525	0.0352192
		1.93333	0.735945	0.0422253
		2.93333	0.652275	0.0418271
		3.93333	0.584792	0.0516674
		4.93333	0.518757	0.0554121
		5.93333	0.460547	0.0594954
		6.93333	0.412722	0.0546405
													Ventral giants means
