# Supplementary material for: Characterization of convergent thickening, a major convergence force producing morphogenic movement in amphibians
Source: eLife. 2022 Apr 11;11:e57642. doi: 10.7554/eLife.57642 (PMC9064293; doi:10.7554/eLife.57642)
Supplement: Figure 3—figure supplement 1—source data 1. [file elife-57642-fig3-figsupp1-data1.xlsx]

## Sheet: Sheet1
	Figure 3-supplementary figure 1C source data ---------------------------------------------------------------------------------------------------->									Figure 3-supplementary figure 1D source data
		Dorsal Lower IMZ	Dorsal Upper IMZ			Ventral Lower IMZ	Ventral Upper IMZ				NIMZ
	time(h)	Explant thickness (um)	Explant thickness (um)		time(h)	Explant thickness (um)	Explant thickness (um)			time (h)	Explant thickness (um)
	-0.5	294	253		-0.5	267	277			-0.5	203
	-0.5	273	271		0.2	277	220			-0.5	230
	0	330	300		1	351	317			-0.5	233
	0.2	275	213		2	319	291			0	280
	0.2	308	223		2.25	427	318			0.2	209
	2	323	259		2.75	354	242			0.2	220
	2.25	339	295		3	409	282			1	300
	2.75		340		3	393	288			2	193
	3		295							2	213
										2.25	205
										2.25	221
										2.75	184
										2.75	196
										3	173
										3	202
										3	211
