# Supplementary material for: Characterization of convergent thickening, a major convergence force producing morphogenic movement in amphibians
Source: eLife. 2022 Apr 11;11:e57642. doi: 10.7554/eLife.57642 (PMC9064293; doi:10.7554/eLife.57642)
Supplement: Figure 3—figure supplement 2—source data 1. [file elife-57642-fig3-figsupp2-data1.xlsx]

## Sheet: Sheet1
Figure 3-supplementary figure 3B source data
	IMZ thickness measures from RDA injected embryos, doubled for purposes of estimating initial sandwich explant thickness, prior to explantation
		Upper IMZ X 2
	time (h)	mean (um)	n	SE
	-1.5	375.26	8	12.5763
	-0.5	342.425	8	14.5205
		Upper DIMZ X2				Upper VIMZ X 2
	time (h)	mean (um)	n	SE		mean (um)		SE
	-0.1	311.655	8	17.3178		331.337	7	11.1703
	0.83	253.486	7	13.3958		250.96	8	9.97508
	1.75	199.553	6	12.6184		207.28	6	16.3289
