# Supplementary material for: Characterization of convergent thickening, a major convergence force producing morphogenic movement in amphibians
Source: eLife. 2022 Apr 11;11:e57642. doi: 10.7554/eLife.57642 (PMC9064293; doi:10.7554/eLife.57642)
Supplement: Figure 3—source data 1. [file elife-57642-fig3-data1.xlsx]

## Sheet: G1-G2 NIMZ Results.csv
Source data for Figure 3C:			All tissues from ventral 180 side of embryo
			Mesoderm width
			mean IMZ
			time (h)	rel. width* (Wt/Wi)	count	SEM
	just after release from cover glass		2.07134	0.951266	6	0.0169283
			3.11194	0.662643	6	0.0261486
			4.00944	0.583348	6	0.0181802
			6.30444	0.539769	6	0.0126585
			7.95944	0.500141	6	0.0153711
			Ectoderm width
			mean NIMZ
			time (h)	rel. width* (Wt/Wi)	count	SEM
	just after release from cover glass		2.19051	0.964201	6	0.0159136
			3.17736	0.884929	6	0.030616
			4.31634	0.859324	6	0.0366391
			6.21819	0.834989	6	0.0303809
			7.88028	0.790466	6	0.0237723
				*relative width normalized to the mean width just after iniitial two giants were made, prior to being put under glass = Wi
Source data for Figure 3D:
			Mesoderm Thickness
			IMZ means
			time (h)	rel. thickness	count	SEM
	Just after healing to make double		2.90389	1	2
			3.32889	0.991719	2	0.0313341
			3.84542	1.03492	2	0.0554963
			4.61194	1.11806	2	0.0947542
			5.64514	1.18656	2	0.0745777
			6.71875	1.26824	2	0.0783295
			7.75319	1.40617	2	0.193088
			8.78639	1.47169	2	0.176016
			9.82806	1.54011	2	0.180744
			10.7694	1.54085	2	0.148132
			Ectoderm Thickness
			NIMZ means
			time (h)	rel. thickness	count	SEM
	Just after healing to make double		2.89556	1	2
			3.32889	0.92078	2	0.0105447
			3.84542	0.913269	2	0.0434158
			4.61194	0.905972	2	0.0231922
			5.64514	0.925277	2	0.0033514
			6.71875	0.930725	2	0.00486207
			7.75319	0.971805	2	0.0157309
			8.78639	1.01522	2	0.019088
			9.82806	0.991337	2	0.0257252
			10.8194	0.983389	2	0.0356821
