# Supplementary material for: Characterization of convergent thickening, a major convergence force producing morphogenic movement in amphibians
Source: eLife. 2022 Apr 11;11:e57642. doi: 10.7554/eLife.57642 (PMC9064293; doi:10.7554/eLife.57642)
Supplement: Figure 4—source data 1. [file elife-57642-fig4-data1.xlsx]

## Sheet: Sheet1
Figure 4C source data
	NIMZ
	Time(h)	relative area (At/Ai)	SEM
	-1.6	1		3
	-0.85	0.976612	0.0194032	3
	0.11875	1.11579	0.0475013	6
	0.99375	1.20443	0.0597239	8
	1.99375	1.36366	0.0714794	8
	2.99	1.51418	0.126395	5
	Anterior (lower) DMZ
	Time(h)	relative area (At/Ai)	SEM	n
	-1.2	1		3
	-0.64	0.961438	0.165613	4
	0.08125	0.877922	0.11789	4
	1.05625	0.595689	0.0320452	7
	2.06429	0.562569	0.019021	6
	2.975	0.555983	0.0331474	4
	3.8	0.579308	0.0459907	2
