# Supplementary material for: Characterization of convergent thickening, a major convergence force producing morphogenic movement in amphibians
Source: eLife. 2022 Apr 11;11:e57642. doi: 10.7554/eLife.57642 (PMC9064293; doi:10.7554/eLife.57642)
Supplement: Figure 5—figure supplement 2—source data 1. [file elife-57642-fig5-figsupp2-data1.xlsx]

## Sheet: Sheet1
Figure 5-supplementary figuree 2B source data
					WE Dorsal				WE Ventral				Explant Dorsal				Explant Ventral
		Time* (h)	SEM		thickness (um)	SEM	n		thickness (um)	SEM	n		thickness (um)	SEM	n		thickness (um)	SEM	n
	st 10	0.175	0.311916		30.0938	1.21545	4		36.475	1.47387	4		33.1562	1.60125	4		33.7778	0.189134	3
	st 10.5	2.5	0.228218		22.4	0.44017	4		25.95	2.396	4		29.975	0.809964	4		31.1188	1.38622	4
		*Explants and control embryos fixed at the same time.
				IFT at different strains
Figure 5-supplementary figure 2C source data						Figure 5-supplementary figure 2D source data
		AC						IMZ
	time from 10	strain	IFT				time from 10	strain	IFT
	(h)	(%)	(mN/m)				(h)	(%)	(mN/m)
	1.6	10	0.06				1.6	11	0.17
	3.5	12	0.08				3.4	12	0.14
	3.15	15	0.07				3	13	0.2
	2.1	17	0.04				4.7	14	0.34
	2.4	19	0.05				3.93	15	0.21
	1.97	20	0.05				3.63	20	0.28
	0.57	22	0.1				1.8	21	0.5
	5.1	22	0.14				4.95	21	0.35
	4.1	23	0.08				1.05	22	0.24
	2.17	24	0.15				4.4	27	0.31
	4.26	29	0.15				0.9	28	0.32
	5.45	29	0.16				2.4	28	0.6
	1.2	30	0.14				5.3	28	0.62
