# Supplementary material for: Characterization of convergent thickening, a major convergence force producing morphogenic movement in amphibians
Source: eLife. 2022 Apr 11;11:e57642. doi: 10.7554/eLife.57642 (PMC9064293; doi:10.7554/eLife.57642)
Supplement: Figure 5—figure supplement 2—source data 2. [file elife-57642-fig5-figsupp2-data2.xlsx]

## Sheet: Sheet1
Figure 5-supplementary figure 2E source data
	DIMZ wonton			DIMZ wonton			DIMZ wonton			DIMZ wonton			DIMZ wonton			DIMZ wonton	DIMZ wonton
	191023			191014			190611			190606			190523			190618	190710
Inflection time (minutes from G0)	-42			-42			-36			-45			-41			-43	-40		-41.2857		-0.688095	inflection time(h)
Force increase (uN)	0.58			0.17			0.64			0.27			0.76								0.484	mean force increase (uN)
	G0 time (m)	ZForce(uN)		G0 time (m)	ZForce(uN)		G0 time (m)	adjusted force(uN)		G0 time (m)	ZForce(uN)		G0 time (m)	ZForce(uN)							0.17	min force increase
	-105	0.046762		-58	0		-100	0		-50	0		-65	0							0.76	max force increase
	-104.997	0.0420858		-57.9967	-0.00425109		-99.9967	-0.00389683		-49.9967	0.00389683		-64.9967	0.0023381
	-104.993	0.0350715		-57.9933	-0.00212555		-99.9933	0.00389683		-49.9933	0.00779367		-64.9933	-0.0046762
	-104.99	0.0327334		-57.99	0.00212555		-99.99	0.00194842		-49.99	0.00389683		-64.99	-0.0046762
	-104.987	0.0163667		-57.9867	-0.000405129		-99.9867	0.00700885		-49.9867	-0.000784822		-64.9867	0.00428106
	-104.983	0.017662		-57.9833	0.00172042		-99.98	0.00700885		-49.9833	0.00220093		-64.9833	0.00428106
	-104.98	0.0242812		-57.98	-0.00678177		-99.9767	0.00311201		-49.98	0.000252515		-64.98	0.00194296
	-104.977	0.0298575		-57.9767	0.00430104		-99.9733	0.00311201		-49.9767	-0.00559274		-64.9767	0.00194296
	-104.973	0.0224481		-57.9733	0.0021755		-99.97	0.0071351		-49.9733	-0.00326555		-64.9733	0.0109002
	-104.97	0.0373769		-57.97	0.00855213		-99.9667	0.0218114		-49.97	0.0127006		-64.97	-0.00780458
	-104.967	0.0346436		-57.9667	4.99503e-05		-99.9633	0.0237598		-49.9667	0.00217365		-64.9667	0.00115268
	-104.963	0.0295723		-57.9633	0.00475612		-99.96	0.0277829		-49.9633	0.00528567		-64.9633	0.0120529
	-104.96	0.0251486		-57.96	0.0052112		-99.9567	0.0141439		-49.96	0.00956127		-64.96	-3.27334e-05
	-104.957	0.0313726		-57.9567	0.00354073		-99.9533	0.00635028		-49.9567	-0.00175046		-64.9567	0.0108675
	-104.953	0.0363013		-57.9533	0.00232535		-99.95	0.0133591		-49.9533	0.00525839		-64.9533	0.01112
	-104.95	0.0127777		-57.95	-0.00101559		-99.9467	0.0193306		-49.95	0.00758558		-64.95	0.00694883
	-104.947	0.0266637		-57.9467	0.00581613		-99.9433	-0.00599879		-49.9467	0.000170681		-64.9467	0.000187048
	-104.943	0.0386067		-57.9433	0.0152285		-99.94	0.00892998		-49.9433	0.00743204		-64.9433	0.00835403
	-104.94	0.0220974		-57.94	0.0169988		-99.9367	0.0171024		-49.94	0.00664722		-64.94	0.0135353
	-104.937	0.0363785		-57.9367	-0.00719242		-99.9333	0.00943501		-49.9367	0.00897441		-64.9367	0.0104069
	-104.933	0.0462359		-57.9333	0.00434547		-99.93	0.0224154		-49.9333	0.01325		-64.9333	0.0162358
	-104.93	0.0377837		-57.93	-0.00238635		-99.9267	0.0157853		-49.93	0.0038867		-64.93	-0.000921212
	-104.927	0.0423173		-57.9267	0.0121373		-99.9233	0.0287656		-49.9267	0.00816231		-64.9267	0.00789343
	-104.923	0.0341176		-57.9233	0.00454527		-99.92	0.0260324		-49.9233	-0.000416182		-64.9233	0.0137223
	-104.92	0.0273558		-57.92	0.00160946		-99.9167	0.0273223		-49.92	0.0116531		-64.92	0.0159178
	-104.917	0.0378609		-57.9167	0.00550538		-99.9133	0.0255001		-49.9167	0.00514928		-64.9167	0.0130419
	-104.913	0.040704		-57.9133	0.00940129		-99.91	0.035621		-49.9133	0.00942488		-64.9133	0.0012088
	-104.91	0.0345899		-57.91	-0.00881846		-99.9067	0.0201599		-49.91	0.00200999		-64.91	0.00937578
	-104.907	0.0444473		-57.9067	0.00995627		-99.9033	0.036126		-49.9067	0.00823401		-64.9067	0.0135142
	-104.903	0.0479381		-57.9033	0.00322445		-99.8967	0.0257253		-49.9033	0.00757545		-64.9033	0.00401919
	-104.9	0.0301334		-57.9	0.013497		-99.8933	0.0258516		-49.9	0.00795422		-64.9	0.0128338
	-104.897	0.0399909		-57.8967	0.0025141		-99.89	0.0310383		-49.8967	0.0102814		-64.8967	0.00761987
	-104.893	0.0381578		-57.8933	0.00853555		-99.8867	0.0440186		-49.8933	0.00365133		-64.8933	0.0140964
	-104.89	0.0416486		-57.89	0.00732017		-99.8833	0.0373886		-49.89	0.0137722		-64.89	-0.000722473
	-104.887	0.0402107		-57.8867	-0.00366274		-99.88	0.0354401		-49.8867	0.0111652		-64.8867	0.00744451
	-104.883	0.0313633		-57.8833	0.0100007		-99.8767	0.0406268		-49.8833	0.011544		-64.8833	0.0109353
	-104.88	0.0488827		-57.88	0.0245243		-99.8733	0.0419167		-49.88	0.0119228		-64.88	0.00507368
	-104.877	0.0260067		-57.8767	0.0169323		-99.87	0.054897		-49.8767	0.00736735		-64.8767	0.00856446
	-104.873	0.0341737		-57.8733	0.0102005		-99.8667	0.0393097		-49.8733	0.0206002		-64.8733	0.00309798
	-104.87	0.0470169		-57.87	0.0174873		-99.8633	0.0483932		-49.87	0.0100733		-64.87	0.00827921
	-104.867	0.0409027		-57.8667	0.00351863		-99.86	0.0672188		-49.8667	0.0144752		-64.8667	0.0070938
	-104.863	0.0367316		-57.8633	0.00954009		-99.8567	0.0488983		-49.8633	0.00991978		-64.8633	0.00292263
	-104.86	0.0208699		-57.86	-0.00442857		-99.8533	0.0579818		-49.86	0.0141954		-64.86	0.00108955
	-104.857	0.0337131		-57.8567	0.00968994		-99.85	0.0522628		-49.8567	0.0115884		-64.8567	0.00691844
	-104.853	0.0435705		-57.8533	0.00508367		-99.8467	0.0613463		-49.8533	0.0256061		-64.8533	0.00508537
	-104.85	0.0160183		-57.85	0.00811937		-99.8433	0.0605615		-49.85	0.0228729		-64.85	0.0055904
	-104.847	0.0375663		-57.8467	0.000527348		-99.84	0.0606877		-49.8467	0.0271485		-64.8467	0.00778587
	-104.843	0.0433951		-57.8433	0.00781414		-99.8367	0.0599029		-49.8433	0.0194811		-64.8433	0.0036147
	-104.84	0.0322097		-57.84	0.00492829		-99.8333	0.0689864		-49.84	0.0296019		-64.84	0.00347208
	-104.837	0.0367432		-57.8367	0.00457311		-99.83	0.07015		-49.8367	0.0250465		-64.8367	0.00397711
	-104.833	-0.0235423		-57.8333	0.00249752		-99.8267	0.0683279		-49.8333	0.0324341		-64.8333	0.00617259
	-104.83	0.00696286		-57.83	0.0208671		-99.8233	0.0655946		-49.83	0.0356724		-64.83	0.00836806
	-104.827	0.025525		-57.8267	-0.00843544		-99.82	0.0746781		-49.8267	0.0348876		-64.8267	0.00354924
	-104.823	0.0443397		-57.8233	-0.00327419		-99.8133	0.0729822		-49.8233	0.0412379		-64.8233	0.00574471
	-104.82	0.000420858		-57.82	0.00446768		-99.81	0.0780427		-49.82	0.0385046		-64.82	0.0139117
	-104.817	-0.0224551		-57.8167	0.0160056		-99.8067	0.0831031		-49.8167	0.0487517		-64.8167	0.00909287
	-104.813	0.00506433		-57.8133	0.0105391		-99.8033	0.0832294		-49.8133	0.0352391		-64.8133	0.00830259
	-104.81	-0.00612115		-57.81	0.00507262		-99.8	0.0824445		-49.81	0.0434115		-64.81	0.00348377
	-104.807	-0.0113351		-57.8067	0.0119543		-99.7933	0.078674		-49.8067	0.0497618		-64.8067	0.00503159
	-104.803	0.0191701		-57.8033	0.0064878		-99.7867	0.0858091		-49.8033	0.0568969		-64.8033	0.0178748
	-104.8	0.0330561		-57.8	0.00486729		-99.78	0.0869727		-49.8	0.0522152		-64.8	0.013056
	-104.797	0.00291327		-57.7967	0.00152635		-99.7767	0.099953		-49.7967	0.0542899		-64.7967	0.0146038
	-104.793	0.0264042		-57.7933	0.0105336		-99.77	0.0933229		-49.7933	0.0488234		-64.7933	0.0138135
	-104.79	0.037952		-57.79	0.020401		-99.7633	0.0835809		-49.79	0.0657006		-64.79	0.0196424
	-104.787	0.0467667		-57.7867	0.0140743		-99.76	0.0955239		-49.7867	0.0649158		-64.7867	0.0148236
	-104.783	0.0213001		-57.7833	0.013314		-99.7533	0.0987621		-49.7833	0.0701025		-64.7833	0.0116952
	-104.78	0.0211575		-57.78	0.00911285		-99.7467	0.108883		-49.78	0.0673692		-64.78	0.0222003
	-104.777	0.0346483		-57.7767	0.0126036		-99.74	0.107061		-49.7767	0.0686591		-64.7767	0.02141
	-104.773	0.0391819		-57.7733	0.0194853		-99.7333	0.102379		-49.7733	0.0866999		-64.7733	0.0242531
	-104.77	0.0339679		-57.77	0.0199903		-99.7267	0.106402		-49.77	0.0800698		-64.77	0.0287867
	-104.767	0.0427826		-57.7667	0.0247465		-99.72	0.117434		-49.7667	0.0831818		-64.7667	0.032025
	-104.763	0.0373161		-57.7633	0.01928		-99.7133	0.109767		-49.7633	0.0883685		-64.7633	0.0331776
	-104.76	0.029764		-57.76	0.0134084		-99.7067	0.11885		-49.76	0.0916068		-64.76	0.0347255
	-104.757	0.0192262		-57.7567	0.0160389		-99.7033	0.111057		-49.7567	0.0849767		-64.7567	0.0409495
	-104.753	0.0350551		-57.7533	0.0207951		-99.6967	0.124037		-49.7533	0.0921118		-64.7533	0.0484688
	-104.75	0.0295887		-57.75	0.0204399		-99.69	0.122215		-49.75	0.0953501		-64.75	0.0470309
	-104.747	0.0407414		-57.7467	0.0379493		-99.6867	0.123378		-49.7467	0.107546		-64.7467	0.0419596
	-104.743	0.0278655		-57.7433	0.0171489		-99.68	0.128439		-49.7433	0.0997519		-64.7433	0.0571408
	-104.74	0.0436944		-57.74	0.0240306		-99.6767	0.138433		-49.74	0.106887		-64.74	0.0557029
	-104.737	0.0518614		-57.7367	0.0266611		-99.67	0.126743		-49.7367	0.106102		-64.7367	0.0595888
	-104.733	0.0413236		-57.7333	0.0207895		-99.6667	0.137775		-49.7333	0.111289		-64.7333	0.0658129
	-104.73	0.0405333		-57.73	0.0331876		-99.6633	0.129981		-49.73	0.118298		-64.73	0.074375
	-104.727	0.0533765		-57.7267	0.0358182		-99.66	0.141013		-49.7267	0.114527		-64.7267	0.0705989
	-104.723	0.0615435		-57.7233	0.0405743		-99.6567	0.150097		-49.7233	0.113742		-64.7233	0.076823
	-104.72	0.0626962		-57.72	0.0432049		-99.6533	0.153209		-49.72	0.122826		-64.72	0.0853851
	-104.717	0.0665821		-57.7167	0.0437099		-99.65	0.147363		-49.7167	0.121004		-64.7167	0.0862853
	-104.713	0.0700729		-57.7133	0.0454803		-99.6467	0.151387		-49.7133	0.128139		-64.7133	0.083552
	-104.71	0.0635636		-57.71	0.0481109		-99.6433	0.145541		-49.71	0.129302		-64.71	0.0957476
	-104.707	0.0717306		-57.7067	0.0456302		-99.64	0.156573		-49.7067	0.12748		-64.7067	0.0906762
	-104.703	0.0798976		-57.7033	0.0567629		-99.6367	0.160596		-49.7033	0.126695		-64.7033	0.112872
	-104.7	0.0814454		-57.7	0.0636446		-99.6333	0.157737		-49.7	0.135779		-64.7	0.0988432
	-104.697	0.0872743		-57.6967	0.061569		-99.63	0.161886		-49.6967	0.137069		-64.6967	0.106758
	-104.693	0.0901174		-57.6933	0.0654649		-99.6267	0.159938		-49.6933	0.138232		-64.6933	0.104024
	-104.69	0.0982844		-57.69	0.0723466		-99.6233	0.164998		-49.69	0.130565		-64.69	0.11622
	-104.687	0.0974941		-57.6867	0.070271		-99.62	0.174082		-49.6867	0.142634		-64.6867	0.118163
	-104.683	0.100337		-57.6833	0.0805435		-99.6167	0.170185		-49.6833	0.147821		-64.6833	0.120106
	-104.68	0.110842		-57.68	0.0784679		-99.6133	0.168363		-49.68	0.149111		-64.68	0.117373
	-104.677	0.104728		-57.6767	0.0793781		-99.61	0.175372		-49.6767	0.147289		-64.6767	0.119316
	-104.673	0.126924		-57.6733	0.0853995		-99.6067	0.173549		-49.6733	0.150401		-64.6733	0.120216
	-104.67	0.126529		-57.67	0.0922812		-99.6033	0.176661		-49.67	0.157536		-64.67	0.139426
	-104.667	0.125091		-57.6667	0.0987078		-99.6	0.182633		-49.6667	0.160774		-64.6667	0.130073
	-104.663	0.1243		-57.6633	0.105134		-99.5967	0.176788		-49.6633	0.162849		-64.6633	0.134354
	-104.66	0.125848		-57.66	0.0983526		-99.5933	0.177951		-49.66	0.156092		-64.66	0.140973
	-104.657	0.135706		-57.6567	0.100528		-99.59	0.187035		-49.6567	0.175044		-64.6567	0.140578
	-104.653	0.150239		-57.6533	0.118038		-99.5867	0.185086		-49.6533	0.175044		-64.6533	0.142521
	-104.65	0.138154		-57.65	0.118087		-99.5833	0.197029		-49.65	0.170363		-64.65	0.152774
	-104.647	0.146716		-57.6467	0.122794		-99.58	0.198193		-49.6467	0.172437		-64.6467	0.152379
	-104.643	0.163588		-57.6433	0.113886		-99.5767	0.190399		-49.6433	0.173601		-64.6433	0.15666
	-104.64	0.15384		-57.64	0.125019		-99.5733	0.196371		-49.64	0.184633		-64.64	0.156265
	-104.637	0.168374		-57.6367	0.133166		-99.57	0.203506		-49.6367	0.178914		-64.6367	0.15756
	-104.633	0.169921		-57.6333	0.139593		-99.5633	0.206618		-49.6333	0.180077		-64.6333	0.16846
	-104.63	0.184455		-57.63	0.12856		-99.56	0.202721		-49.63	0.187212		-64.63	0.168065
	-104.627	0.179384		-57.6267	0.139237		-99.5567	0.215701		-49.6267	0.192399		-64.6267	0.167022
	-104.623	0.188341		-57.6233	0.148245		-99.5533	0.209856		-49.6233	0.190577		-64.6233	0.171303
	-104.62	0.190284		-57.62	0.164894		-99.55	0.211931		-49.62	0.197586		-64.62	0.173246
	-104.617	0.180536		-57.6167	0.156392		-99.5467	0.212057		-49.6167	0.185895		-64.6167	0.183499
	-104.613	0.192732		-57.6133	0.154721		-99.5433	0.215043		-49.6133	0.20095		-64.6133	0.181161
	-104.61	0.202985		-57.61	0.158162		-99.54	0.223089		-49.61	0.206011		-64.61	0.180766
	-104.607	0.197913		-57.6067	0.17142		-99.5367	0.224253		-49.6067	0.206137		-64.6067	0.185047
	-104.603	0.221799		-57.6033	0.175721		-99.5333	0.224253		-49.6033	0.209249		-64.6033	0.18699
	-104.6	0.214785		-57.6	0.16894		-99.53	0.226327		-49.6	0.205352		-64.6	0.193609
	-104.597	0.209714		-57.5967	0.177897		-99.5267	0.223594		-49.5967	0.208591		-64.5967	0.192566
	-104.593	0.204642		-57.5933	0.1907		-99.5233	0.219697		-49.5933	0.218585		-64.5933	0.196847
	-104.59	0.221514		-57.59	0.181793		-99.52	0.227743		-49.59	0.2178		-64.59	0.201128
	-104.587	0.234105		-57.5867	0.183968		-99.5167	0.234879		-49.5867	0.217927		-64.5867	0.191776
	-104.583	0.224752		-57.5833	0.186549		-99.5133	0.239939		-49.5833	0.215978		-64.5833	0.204366
	-104.58	0.231371		-57.58	0.198542		-99.51	0.237991		-49.58	0.228174		-64.58	0.210986
	-104.577	0.240329		-57.5767	0.196011		-99.5067	0.239939		-49.5767	0.224403		-64.5767	0.215267
	-104.573	0.237991		-57.5733	0.200717		-99.5033	0.242014		-49.5733	0.229464		-64.5733	0.203576
	-104.57	0.223962		-57.57	0.208409		-99.5	0.23422		-49.57	0.22959		-64.57	0.216167
	-104.567	0.230581		-57.5667	0.206739		-99.4967	0.240191		-49.5667	0.230753		-64.5667	0.225124
	-104.563	0.247453		-57.5633	0.210585		-99.4933	0.245252		-49.5633	0.241785		-64.5633	0.225124
	-104.56	0.24641		-57.56	0.215291		-99.49	0.245378		-49.56	0.24386		-64.56	0.231743
	-104.557	0.253029		-57.5567	0.227639		-99.4867	0.241481		-49.5567	0.24386		-64.5567	0.220053
	-104.553	0.259648		-57.5533	0.225969		-99.48	0.250565		-49.5533	0.23723		-64.5533	0.223686
	-104.55	0.252634		-57.55	0.221312		-99.4733	0.253677		-49.55	0.241253		-64.55	0.227967
	-104.547	0.254577		-57.5467	0.220097		-99.4667	0.249906		-49.5467	0.255397		-64.5467	0.234586
	-104.543	0.251196		-57.5433	0.230775		-99.4633	0.268732		-49.5433	0.251626		-64.5433	0.232248
	-104.54	0.255082		-57.54	0.234671		-99.46	0.264835		-49.54	0.254738		-64.54	0.240163
	-104.537	0.262997		-57.5367	0.238972		-99.4567	0.264835		-49.5367	0.256813		-64.5367	0.235486
	-104.533	0.26494		-57.5333	0.240692		-99.4533	0.280549		-49.5333	0.263822		-64.5333	0.244444
	-104.53	0.260263		-57.53	0.249244		-99.45	0.272755		-49.53	0.265897		-64.53	0.242106
	-104.527	0.270516		-57.5267	0.259922		-99.4467	0.26691		-49.5267	0.269009		-64.5267	0.237429
	-104.523	0.274149		-57.5233	0.259922		-99.4433	0.257168		-49.5233	0.263163		-64.5233	0.239372
	-104.52	0.262459		-57.52	0.254		-99.44	0.264303		-49.52	0.269135		-64.52	0.243006
	-104.517	0.284007		-57.5167	0.264678		-99.4367	0.262481		-49.5167	0.269261		-64.5167	0.249625
	-104.513	0.270626		-57.5133	0.257896		-99.4333	0.286493		-49.5133	0.264579		-64.5133	0.247287
	-104.51	0.276597		-57.51	0.289069		-99.43	0.259747		-49.51	0.284695		-64.51	0.256244
	-104.507	0.285555		-57.5067	0.258806		-99.4267	0.275587		-49.5067	0.27885		-64.5067	0.23002
	-104.503	0.251668		-57.5033	0.296356		-99.4233	0.278699		-49.5033	0.274953		-64.5033	0.283368
	-104.5	0.360056		-57.5	0.216146		-99.42	0.284544		-49.5	0.284947		-64.5	0.17991
	-104.333	0.267432		-57.3333	0.261232		-99.2433	0.266575		-49.3333	0.280996		-64.3333	0.236606
	-104.167	0.306862		-57.1667	0.328178		-99.07	0.33145		-49.1667	0.303916		-64.1667	0.21136
	-104	0.267114		-57	0.264412		-98.9033	0.292482		-49	0.276639		-64	0.236431
	-103.833	0.267114		-56.8333	0.254644		-98.7333	0.276894		-48.8333	0.255206		-63.8333	0.218374
	-103.667	0.248409		-56.6667	0.250393		-98.57	0.276894		-48.6667	0.262089		-63.6667	0.209022
	-103.5	0.248409		-56.5	0.244016		-98.4033	0.270138		-48.5	0.256243		-63.5	0.194993
	-103.333	0.253733		-56.3333	0.244016		-98.2367	0.277932		-48.3333	0.24845		-63.3333	0.206683
	-103.167	0.237366		-56.1667	0.241891		-98.07	0.268189		-48.1667	0.238708		-63.1667	0.204345
	-103	0.253733		-56	0.247002		-97.9033	0.262344		-48	0.240656		-63	0.187979
	-102.833	0.240352		-55.8333	0.244877		-97.7333	0.262344		-47.8333	0.234811		-62.8333	0.192655
	-102.667	0.238014		-55.6667	0.247002		-97.57	0.248705		-47.6667	0.22312		-62.6667	0.193302
	-102.5	0.238014		-55.5	0.251253		-97.4033	0.262344		-47.5	0.225069		-62.5	0.188626
	-102.333	0.235676		-55.3333	0.249988		-97.2367	0.248705		-47.3333	0.230003		-62.3333	0.176936
	-102.167	0.238014		-55.1667	0.245737		-97.07	0.246757		-47.1667	0.231951		-62.1667	0.188626
	-102	0.241		-55	0.241486		-96.9033	0.246757		-47	0.222209		-62	0.188626
	-101.833	0.238662		-54.8333	0.241486		-96.7333	0.240912		-46.8333	0.228054		-61.8333	0.186288
	-101.667	0.238662		-54.6667	0.245737		-96.57	0.238963		-46.6667	0.228054		-61.6667	0.176936
	-101.5	0.238662		-54.5	0.247862		-96.4033	0.23117		-46.5	0.220261		-61.5	0.176936
	-101.333	0.238662		-54.3333	0.252974		-96.2367	0.235066		-46.3333	0.226106		-61.3333	0.176936
	-101.167	0.241		-54.1667	0.250848		-96.07	0.250654		-46.1667	0.228054		-61.1667	0.174598
	-101	0.243985		-54	0.24022		-95.9033	0.232207		-46	0.224158		-61	0.174598
	-100.833	0.241647		-53.8333	0.238095		-95.73	0.238052		-45.8333	0.228054		-60.8333	0.19395
	-100.667	0.243985		-53.6667	0.235969		-95.57	0.232207		-45.6667	0.229092		-60.6667	0.177583
	-100.5	0.241647		-53.5	0.24022		-95.4	0.241949		-45.5	0.23104		-60.5	0.175245
	-100.333	0.246324		-53.3333	0.24022		-95.2367	0.226362		-45.3333	0.229092		-60.3333	0.161217
	-100.167	0.225281		-53.1667	0.241081		-95.07	0.240001		-45.1667	0.229092		-60.1667	0.175245
	-100	0.243985		-53	0.247457		-94.9033	0.236104		-45	0.23104		-60	0.170569
	-99.8333	0.249309		-52.8333	0.250848		-94.7333	0.238052		-44.8333	0.229092		-59.8333	0.170569
	-99.6667	0.244633		-52.6667	0.253834		-94.5667	0.241949		-44.6667	0.234937		-59.6667	0.170569
	-99.5	0.244633		-52.5	0.241081		-94.4033	0.236104		-44.5	0.236885		-59.5	0.175245
	-99.3333	0.246971		-52.3333	0.253834		-94.2333	0.236104		-44.3333	0.234937		-59.3333	0.170569
	-99.1667	0.228266		-52.1667	0.238955		-94.07	0.234155		-44.1667	0.229092		-59.1667	0.189274
	-99	0.246971		-52	0.247457		-93.9033	0.241949		-44	0.229092		-59	0.172907
	-98.8333	0.246971		-51.8333	0.258085		-93.73	0.243897		-43.8333	0.23104		-58.8333	0.163555
	-98.6667	0.246971		-51.6667	0.251708		-93.5667	0.25078		-43.6667	0.226232		-58.6667	0.170569
	-98.5	0.246971		-51.5	0.253834		-93.4033	0.252728		-43.5	0.235974		-58.5	0.173555
	-98.3333	0.256971		-51.3333	0.248318		-93.2333	0.244935		-43.3333	0.232078		-58.3333	0.171217
	-98.1667	0.249957		-51.1667	0.244066		-93.0667	0.244935		-43.1667	0.237923		-58.1667	0.173555
	-98	0.247619		-51	0.244066		-92.9033	0.241038		-43	0.235974		-58	0.171217
	-97.8333	0.249957		-50.8333	0.258945		-92.7367	0.239089		-42.8333	0.237923		-57.8333	0.171217
	-97.6667	0.247619		-50.6667	0.241941		-92.5667	0.246883		-42.6667	0.24182		-57.6667	0.171217
	-97.5	0.268662		-50.5	0.254694		-92.4	0.242986		-42.5	0.234026		-57.5	0.173555
	-97.3333	0.268662		-50.3333	0.25682		-92.2333	0.239089		-42.3333	0.234026		-57.3333	0.178231
	-97.1667	0.271		-50.1667	0.241941		-92.07	0.242986		-42.1667	0.234026		-57.1667	0.173555
	-97	0.250605		-50	0.250443		-91.9	0.241038		-42	0.239871		-57	0.175893
	-96.8333	0.271648		-49.8333	0.248318		-91.7367	0.237141		-41.8333	0.240909		-56.8333	0.166541
	-96.6667	0.273986		-49.6667	0.259805		-91.5667	0.252728		-41.6667	0.242857		-56.6667	0.173555
	-96.5	0.271648		-49.5	0.25768		-91.4033	0.268316		-41.5	0.244805		-56.5	0.171217
	-96.3333	0.271648		-49.3333	0.251303		-91.2333	0.241038		-41.3333	0.254547		-56.3333	0.173555
	-96.1667	0.271648		-49.1667	0.247052		-91.07	0.237141		-41.1667	0.254547		-56.1667	0.166541
	-96	0.269309		-49	0.236424		-90.9	0.235193		-41	0.244805		-56	0.164202
	-95.8333	0.271648		-48.8333	0.261931		-90.7333	0.232333		-40.8333	0.237012		-55.8333	0.161864
	-95.6667	0.269309		-48.6667	0.251303		-90.5667	0.244024		-40.6667	0.240909		-55.6667	0.164202
	-95.5	0.269309		-48.5	0.251303		-90.4	0.228436		-40.5	0.242857		-55.5	0.176541
	-95.3333	0.271648		-48.3333	0.247052		-90.23	0.232333		-40.3333	0.246754		-55.3333	0.16485
	-95.1667	0.271648		-48.1667	0.244927		-90.0633	0.230385		-40.1667	0.250651		-55.1667	0.167188
	-95	0.271648		-48	0.261931		-89.9033	0.230385		-40	0.250651		-55	0.157836
	-94.8333	0.274633		-47.8333	0.251303		-89.7333	0.240127		-39.8333	0.252599		-54.8333	0.169526
	-94.6667	0.276971		-47.6667	0.255554		-89.57	0.230385		-39.6667	0.254547		-54.6667	0.162512
	-94.5	0.293338		-47.5	0.250038		-89.4033	0.228436		-39.5	0.250651		-54.5	0.169526
	-94.3333	0.291		-47.3333	0.250038		-89.2367	0.230385		-39.3333	0.250651		-54.3333	0.167188
	-94.1667	0.295676		-47.1667	0.254289		-89.07	0.234282		-39.1667	0.257533		-54.1667	0.167188
	-94	0.293338		-47	0.247912		-88.9033	0.234282		-39	0.259482		-54	0.169526
	-93.8333	0.291		-46.8333	0.252163		-88.7333	0.24792		-38.8333	0.255585		-53.8333	0.16485
	-93.6667	0.293338		-46.6667	0.245787		-88.57	0.228436		-38.6667	0.257533		-53.6667	0.176541
	-93.5	0.293338		-46.5	0.245787		-88.4	0.230385		-38.5	0.255585		-53.5	0.181217
	-93.3333	0.293338		-46.3333	0.250038		-88.2367	0.224539		-38.3333	0.26143		-53.3333	0.185893
	-93.1667	0.293338		-46.1667	0.254289		-88.07	0.230385		-38.1667	0.255585		-53.1667	0.178879
	-93	0.293338		-46	0.245787		-87.9033	0.229474		-38	0.253636		-53	0.199922
	-92.8333	0.291		-45.8333	0.252163		-87.7367	0.226488		-37.8333	0.255585		-52.8333	0.174203
	-92.6667	0.295676		-45.6667	0.235159		-87.57	0.237267		-37.6667	0.259482		-52.6667	0.169526
	-92.5	0.293986		-45.5	0.241536		-87.4033	0.231422		-37.5	0.24974		-52.5	0.176541
	-92.3333	0.296324		-45.3333	0.237285		-87.2367	0.22168		-37.3333	0.255585		-52.3333	0.176541
	-92.1667	0.296324		-45.1667	0.245787		-87.07	0.22168		-37.1667	0.26143		-52.1667	0.183555
	-92	0.293986		-45	0.247912		-86.9033	0.231422		-37	0.264416		-52	0.167188
	-91.8333	0.298662		-44.8333	0.255149		-86.7367	0.22168		-36.8333	0.259482		-51.8333	0.178879
	-91.6667	0.296324		-44.6667	0.242396		-86.57	0.219732		-36.6667	0.262467		-51.6667	0.181217
	-91.5	0.303338		-44.5	0.250898		-86.4033	0.215835		-36.5	0.262467		-51.5	0.178879
	-91.3333	0.298662		-44.3333	0.257275		-86.2367	0.22168		-36.3333	0.281952		-51.3333	0.181217
	-91.1667	0.296324		-44.1667	0.253024		-86.07	0.219732		-36.1667	0.264416		-51.1667	0.181217
	-91	0.296324		-44	0.248773		-85.9033	0.22168		-36	0.262467		-51	0.176541
	-90.8333	0.293986		-43.8333	0.250898		-85.7367	0.215835		-35.8333	0.264416		-50.8333	0.181864
	-90.6667	0.298662		-43.6667	0.250898		-85.57	0.227525		-35.6667	0.264416		-50.6667	0.170174
	-90.5	0.296324		-43.5	0.250898		-85.4033	0.209989		-35.5	0.266364		-50.5	0.167836
	-90.3333	0.315029		-43.3333	0.248773		-85.2367	0.213886		-35.3333	0.266364		-50.3333	0.170174
	-90.1667	0.315029		-43.1667	0.248773		-85.07	0.211938		-35.1667	0.274158		-50.1667	0.181864
	-90	0.308662		-43	0.248773		-84.9033	0.213886		-35	0.266364		-50	0.179526
	-89.8333	0.315029		-42.8333	0.253024		-84.7333	0.215835		-34.8333	0.260519		-49.8333	0.170174
	-89.6667	0.29931		-42.6667	0.248773		-84.57	0.217783		-34.6667	0.266364		-49.6667	0.181864
	-89.5	0.315676		-42.5	0.250898		-84.4033	0.231422		-34.5	0.274158		-49.5	0.172512
	-89.3333	0.29931		-42.3333	0.257275		-84.2367	0.215835		-34.3333	0.258571		-49.3333	0.172512
	-89.1667	0.318014		-42.1667	0.256009		-84.07	0.215835		-34.1667	0.272209		-49.1667	0.181864
	-89	0.315676		-42	0.253884		-83.9033	0.21882		-34	0.277144		-49	0.186541
	-88.8333	0.29931		-41.8333	0.258135		-83.7367	0.214924		-33.8333	0.279092		-48.8333	0.184203
	-88.6667	0.318014		-41.6667	0.260261		-83.57	0.230511		-33.6667	0.277144		-48.6667	0.184203
	-88.5	0.318014		-41.5	0.266637		-83.4033	0.216872		-33.5	0.275195		-48.5	0.195893
	-88.3333	0.315676		-41.3333	0.264512		-83.2367	0.214924		-33.3333	0.267402		-48.3333	0.186541
	-88.1667	0.301648		-41.1667	0.258135		-83.07	0.216872		-33.1667	0.294679		-48.1667	0.179526
	-88	0.318014		-41	0.260261		-82.9033	0.209078		-33	0.28104		-48	0.186541
	-87.8333	0.318014		-40.8333	0.262386		-82.7333	0.212975		-32.8333	0.28104		-47.8333	0.188879
	-87.6667	0.318014		-40.6667	0.270888		-82.57	0.216872		-32.6667	0.282989		-47.6667	0.198231
	-87.5	0.320352		-40.5	0.262386		-82.4033	0.220769		-32.5	0.279092		-47.5	0.184203
	-87.3333	0.318014		-40.3333	0.256009		-82.2367	0.212975		-32.3333	0.290783		-47.3333	0.198231
	-87.1667	0.323338		-40.1667	0.268763		-82.07	0.209078		-32.1667	0.284937		-47.1667	0.186541
	-87	0.318662		-40	0.260261		-81.9033	0.205182		-32	0.284937		-47	0.198231
	-86.8333	0.337367		-39.8333	0.258135		-81.7333	0.220769		-31.8333	0.284937		-46.8333	0.188879
	-86.6667	0.321		-39.6667	0.262386		-81.57	0.214924		-31.6667	0.273247		-46.6667	0.170174
	-86.5	0.325676		-39.5	0.266637		-81.4033	0.209078		-31.5	0.284937		-46.5	0.186541
	-86.3333	0.318662		-39.3333	0.266637		-81.2367	0.212975		-31.3333	0.286886		-46.3333	0.184203
	-86.1667	0.328014		-39.1667	0.256009		-81.07	0.203233		-31.1667	0.290783		-46.1667	0.191217
	-86	0.323338		-39	0.260261		-80.9033	0.20713		-31	0.292731		-46	0.189526
	-85.8333	0.321		-38.8333	0.260261		-80.7333	0.20713		-30.8333	0.292731		-45.8333	0.188879
	-85.6667	0.321		-38.6667	0.253884		-80.57	0.205182		-30.6667	0.295717		-45.6667	0.194203
	-85.5	0.325676		-38.5	0.263246		-80.4033	0.20713		-30.5	0.297665		-45.5	0.189526
	-85.3333	0.321		-38.3333	0.261121		-80.2367	0.205182		-30.3333	0.301562		-45.3333	0.189526
	-85.1667	0.321		-38.1667	0.265372		-80.07	0.203233		-30.1667	0.297665		-45.1667	0.189526
	-85	0.342043		-38	0.267497		-79.9033	0.201285		-30	0.30351		-45	0.191865
	-84.8333	0.321		-37.8333	0.263246		-79.7333	0.193491		-29.8333	0.301562		-44.8333	0.194203
	-84.6667	0.323338		-37.6667	0.276		-79.57	0.191543		-29.6667	0.299614		-44.6667	0.191865
	-84.5	0.321		-37.5	0.273874		-79.4033	0.202322		-29.5	0.295717		-44.5	0.203555
	-84.3333	0.321		-37.3333	0.271748		-79.2367	0.193491		-29.3333	0.295717		-44.3333	0.194203
	-84.1667	0.321		-37.1667	0.278125		-79.07	0.189594		-29.1667	0.295717		-44.1667	0.198879
	-84	0.321		-37	0.265372		-78.9033	0.199336		-29	0.295717		-44	0.187188
	-83.8333	0.323986		-36.8333	0.267497		-78.7367	0.189594		-28.8333	0.311304		-43.8333	0.201217
	-83.6667	0.323986		-36.6667	0.278125		-78.57	0.208167		-28.6667	0.299614		-43.6667	0.198879
	-83.5	0.326324		-36.5	0.271748		-78.4033	0.200374		-28.5	0.297665		-43.5	0.201217
	-83.3333	0.323986		-36.3333	0.263246		-78.2367	0.200374		-28.3333	0.297665		-43.3333	0.191865
	-83.1667	0.333338		-36.1667	0.273874		-78.07	0.19258		-28.1667	0.301562		-43.1667	0.201217
	-83	0.340353		-36	0.265372		-77.9033	0.196477		-28	0.297665		-43	0.205893
	-82.8333	0.342691		-35.8333	0.265372		-77.7367	0.190632		-27.8333	0.280129		-42.8333	0.191865
	-82.6667	0.323986		-35.6667	0.265372		-77.57	0.202322		-27.6667	0.293768		-42.6667	0.201217
	-82.5	0.331		-35.5	0.263246		-77.4033	0.190632		-27.5	0.285975		-42.5	0.198879
	-82.3333	0.340353		-35.3333	0.263246		-77.2367	0.19258		-27.3333	0.289871		-42.3333	0.208231
	-82.1667	0.342691		-35.1667	0.263246		-77.07	0.19258		-27.1667	0.296754		-42.1667	0.203555
	-82	0.340353		-35	0.271748		-76.9033	0.190632		-27	0.298702		-42	0.205893
	-81.8333	0.326324		-34.8333	0.258995		-76.7367	0.186735		-26.8333	0.300651		-41.8333	0.203555
	-81.6667	0.340353		-34.6667	0.269623		-76.57	0.19258		-26.6667	0.302599		-41.6667	0.203555
	-81.5	0.340353		-34.5	0.263246		-76.4033	0.194528		-26.5	0.296754		-41.5	0.201217
	-81.3333	0.340353		-34.3333	0.271748		-76.2367	0.194528		-26.3333	0.292857		-41.3333	0.203555
	-81.1667	0.347367		-34.1667	0.271748		-76.07	0.194528		-26.1667	0.296754		-41.1667	0.198879
	-81	0.342691		-33.9967	0.274734		-75.9033	0.188683		-26	0.298702		-41	0.194203
	-80.8333	0.342691		-33.8333	0.266232		-75.7367	0.20427		-25.8333	0.298702		-40.8333	0.205893
	-80.6667	0.342691		-33.6667	0.272609		-75.57	0.190632		-25.6667	0.300651		-40.6667	0.205893
	-80.5	0.361396		-33.5	0.281111		-75.4033	0.188683		-25.5	0.296754		-40.5	0.201217
	-80.3333	0.345676		-33.3333	0.274734		-75.2367	0.188683		-25.3333	0.302599		-40.3333	0.205893
	-80.1667	0.345676		-33.1667	0.274734		-75.07	0.196477		-25.1667	0.292857		-40.1667	0.203555
	-80	0.343338		-33	0.272609		-74.9033	0.190632		-25	0.302599		-40	0.205893
	-79.8333	0.352691		-32.8333	0.268358		-74.7367	0.196477		-24.8333	0.300651		-39.8333	0.208231
	-79.6667	0.342691		-32.6667	0.266232		-74.57	0.194528		-24.6667	0.302599		-39.6667	0.22226
	-79.5	0.348015		-32.5	0.274734		-74.4033	0.188683		-24.5	0.304548		-39.5	0.224598
	-79.3333	0.345676		-32.3333	0.268358		-74.2367	0.200374		-24.3333	0.298702		-39.3333	0.219922
	-79.1667	0.350353		-32.1667	0.266232		-74.07	0.190632		-24.1667	0.298702		-39.1667	0.212907
	-79	0.345676		-32	0.270483		-73.9033	0.190632		-24	0.316238		-39	0.224598
	-78.8333	0.364381		-31.8333	0.274734		-73.7367	0.194528		-23.8333	0.304548		-38.8333	0.222907
	-78.6667	0.345676		-31.6667	0.274734		-73.57	0.188683		-23.6667	0.306496		-38.6667	0.219922
	-78.5	0.364381		-31.5	0.270483		-73.4033	0.200374		-23.5	0.302599		-38.5	0.225246
	-78.3333	0.366719		-31.3333	0.274734		-73.2367	0.194528		-23.3333	0.302599		-38.3333	0.225246
	-78.1667	0.371396		-31.1667	0.274734		-73.07	0.195566		-23.1667	0.309482		-38.1667	0.222907
	-78	0.345676		-31	0.274734		-72.9033	0.212064		-23	0.31143		-38	0.227584
	-77.8333	0.364381		-30.8333	0.272609		-72.7333	0.196477		-22.8333	0.309482		-37.8333	0.23226
	-77.6667	0.362043		-30.6667	0.278985		-72.57	0.193617		-22.6667	0.309482		-37.6667	0.227584
	-77.5	0.369057		-30.5	0.274734		-72.4033	0.195566		-22.5	0.307533		-37.5	0.229922
	-77.3333	0.362043		-30.3333	0.272609		-72.2367	0.197514		-22.3333	0.319224		-37.3333	0.225246
	-77.1667	0.366719		-30.1667	0.274734		-72.07	0.191669		-22.1667	0.319224		-37.1667	0.229922
	-77	0.364381		-30	0.274734		-71.9033	0.195566		-22	0.315327		-37	0.229922
	-76.8333	0.364381		-29.8333	0.27686		-71.7367	0.193617		-21.8333	0.319224		-36.8333	0.234598
	-76.6667	0.364381		-29.6667	0.281111		-71.57	0.195566		-21.6667	0.31143		-36.6667	0.23226
	-76.5	0.380748		-29.5	0.278985		-71.4033	0.191669		-21.5	0.317276		-36.5	0.24395
	-76.3333	0.383086		-29.3333	0.283236		-71.2367	0.195566		-21.3333	0.309482		-36.3333	0.229922
	-76.1667	0.376072		-29.1667	0.27772		-71.07	0.193617		-21.1667	0.315327		-36.1667	0.229922
	-76	0.364381		-29	0.286222		-70.9033	0.193617		-21	0.321172		-36	0.23226
	-75.8333	0.369057		-28.8333	0.269218		-70.7367	0.195566		-20.8333	0.315327		-35.8333	0.229922
	-75.6667	0.383086		-28.6667	0.279846		-70.57	0.197514		-20.6667	0.321172		-35.6667	0.23226
	-75.5	0.364381		-28.5	0.281971		-70.4033	0.191669		-20.5	0.309482		-35.5	0.239274
	-75.3333	0.367367		-28.3333	0.286222		-70.2367	0.197514		-20.3333	0.317276		-35.3333	0.234598
	-75.1667	0.386072		-28.1667	0.284097		-70.07	0.197514		-20.1667	0.317276		-35.1667	0.234598
	-75	0.386072		-28	0.281971		-69.9033	0.203359		-20	0.33676		-35	0.241612
	-74.8333	0.390748		-27.8333	0.284097		-69.7367	0.197514		-19.8333	0.327018		-34.8333	0.241612
	-74.6667	0.386072		-27.6667	0.286222		-69.57	0.193617		-19.6667	0.317276		-34.6667	0.241612
	-74.5	0.393086		-27.5	0.284097		-69.4033	0.193617		-19.5	0.323121		-34.5	0.241612
	-74.3333	0.393086		-27.3333	0.284097		-69.2367	0.203359		-19.3333	0.321172		-34.3333	0.246288
	-74.1667	0.383734		-27.1667	0.286222		-69.07	0.203359		-19.1667	0.321172		-34.1667	0.241612
	-74	0.383734		-27	0.284097		-68.9033	0.213101		-19	0.327018		-34	0.246288
	-73.8333	0.383734		-26.8333	0.286222		-68.7367	0.203359		-18.8333	0.325069		-33.8333	0.248627
	-73.6667	0.393086		-26.6667	0.288348		-68.57	0.203359		-18.6667	0.317276		-33.6667	0.248627
	-73.5	0.38841		-26.5	0.286222		-68.4033	0.205308		-18.5	0.319224		-33.5	0.246288
	-73.3333	0.386072		-26.3333	0.286222		-68.2367	0.195566		-18.3333	0.319224		-33.3333	0.24395
	-73.1667	0.397762		-26.1667	0.290473		-68.07	0.199463		-18.1667	0.317276		-33.1667	0.248627
	-73	0.386072		-26	0.290473		-67.9033	0.213101		-18	0.318313		-33	0.246288
	-72.8333	0.386072		-25.8333	0.286222		-67.7367	0.218947		-17.8333	0.312468		-32.8333	0.253303
	-72.6667	0.390748		-25.6667	0.292599		-67.57	0.207256		-17.6667	0.330003		-32.6667	0.246288
	-72.5	0.386072		-25.5	0.294724		-67.4033	0.205308		-17.5	0.326107		-32.5	0.253303
	-72.3333	0.393086		-25.3333	0.294724		-67.2367	0.209205		-17.3333	0.320261		-32.3333	0.279022
	-72.1667	0.386072		-25.1667	0.29685		-67.07	0.205308		-17.1667	0.320261		-32.1667	0.262655
	-72	0.390748		-25	0.29685		-66.9033	0.197514		-17	0.324158		-32	0.262655
	-71.8333	0.38841		-24.8333	0.29685		-66.7367	0.199463		-16.8333	0.324158		-31.8333	0.262655
	-71.6667	0.404777		-24.6667	0.301101		-66.57	0.197514		-16.6667	0.32221		-31.6667	0.264993
	-71.5	0.38841		-24.5	0.301101		-66.4033	0.205308		-16.5	0.324158		-31.5	0.276684
	-71.3333	0.38841		-24.3333	0.292599		-66.2367	0.203359		-16.3333	0.318313		-31.3333	0.262655
	-71.1667	0.402439		-24.1667	0.298975		-66.07	0.209205		-16.1667	0.324158		-31.1667	0.265641
	-71	0.390748		-24	0.303227		-65.9033	0.209205		-16	0.304674		-31	0.264993
	-70.8333	0.402439		-23.8333	0.298975		-65.7367	0.209205		-15.8333	0.318313		-30.8333	0.264993
	-70.6667	0.390748		-23.6667	0.305352		-65.57	0.207256		-15.6667	0.328055		-30.6667	0.270317
	-70.5	0.404777		-23.5	0.301961		-65.4033	0.203359		-15.5	0.328055		-30.5	0.270317
	-70.3333	0.383734		-23.3333	0.29685		-65.2367	0.197514		-15.3333	0.318313		-30.3333	0.270317
	-70.1667	0.404777		-23.1667	0.301961		-65.07	0.205308		-15.1667	0.314416		-30.1667	0.270317
	-70	0.404777		-23	0.310463		-64.9033	0.205308		-15	0.318313		-30	0.272655
	-69.8333	0.405424		-22.8333	0.308338		-64.7333	0.209205		-14.8333	0.314416		-29.8333	0.274993
	-69.6667	0.407762		-22.6667	0.29771		-64.57	0.208294		-14.6667	0.339745		-29.6667	0.286684
	-69.5	0.407762		-22.5	0.306212		-64.4033	0.220895		-14.5	0.324158		-29.5	0.27967
	-69.3333	0.405424		-22.3333	0.29771		-64.2367	0.208294		-14.3333	0.328055		-29.3333	0.27967
	-69.1667	0.389058		-22.1667	0.299836		-64.07	0.197514		-14.1667	0.312468		-29.1667	0.282008
	-69	0.407762		-22	0.306212		-63.9033	0.199463		-14	0.32221		-29	0.27967
	-68.8333	0.407762		-21.8333	0.304087		-63.7333	0.203359		-13.8333	0.324158		-28.8333	0.286684
	-68.6667	0.405424		-21.6667	0.308338		-63.57	0.206345		-13.6667	0.335849		-28.6667	0.284346
	-68.5	0.407762		-21.5	0.31684		-63.4033	0.208294		-13.5	0.32221		-28.5	0.284346
	-68.3333	0.405424		-21.3333	0.306212		-63.2367	0.206345		-13.3333	0.32221		-28.3333	0.289022
	-68.1667	0.407762		-21.1667	0.312589		-63.07	0.203359		-13.1667	0.335849		-28.1667	0.289022
	-68	0.405424		-21	0.306212		-62.9033	0.206345		-13	0.328055		-27.9967	0.29136
	-67.8333	0.407762		-20.8333	0.312589		-62.7333	0.206345		-12.8333	0.338834		-27.8333	0.29136
	-67.6667	0.407762		-20.6667	0.312589		-62.57	0.218036		-12.6667	0.328055		-27.6667	0.29136
	-67.5	0.405424		-20.5	0.308338		-62.4033	0.2005		-12.5	0.332989		-27.5	0.307727
	-67.3333	0.389058		-20.3333	0.306212		-62.2367	0.206345		-12.3333	0.329092		-27.3333	0.300712
	-67.1667	0.405424		-20.1667	0.312589		-62.07	0.202448		-12.1667	0.327144		-27.1667	0.303051
	-67	0.407762		-20	0.306212		-61.9	0.208294		-12	0.332989		-27	0.305389
	-66.8333	0.405424		-19.8333	0.33597		-61.7333	0.206345		-11.8333	0.327144		-26.8333	0.303051
	-66.6667	0.419453		-19.6667	0.318966		-61.57	0.196603		-11.6667	0.327144		-26.6667	0.298374
	-66.5	0.405424		-19.5	0.314714		-61.4033	0.196603		-11.5	0.332989		-26.5	0.307727
	-66.3333	0.426467		-19.3333	0.308338		-61.2367	0.2005		-11.3333	0.332989		-26.3333	0.303051
	-66.1667	0.407762		-19.1667	0.308338		-61.07	0.196603		-11.1667	0.348576		-26.1667	0.312403
	-66	0.405424		-19	0.314714		-60.9033	0.198551		-11	0.332989		-26	0.305389
	-65.8333	0.407762		-18.8333	0.314714		-60.7333	0.2005		-10.8333	0.338834		-25.8333	0.305389
	-65.6667	0.417115		-18.6667	0.308338		-60.57	0.2005		-10.6667	0.331041		-25.6667	0.310065
	-65.5	0.417115		-18.5	0.314714		-60.4033	0.198551		-10.5	0.340783		-25.5	0.307727
	-65.3333	0.424129		-18.3333	0.321091		-60.2367	0.198551		-10.3333	0.342731		-25.3333	0.305389
	-65.1667	0.407762		-18.1667	0.314714		-60.07	0.196603		-10.1667	0.331041		-25.1667	0.310065
	-65	0.412439		-18	0.323217		-59.9033	0.2005		-10	0.331041		-25	0.321755
	-64.8333	0.4101		-17.8333	0.31684		-59.7367	0.2005		-9.83333	0.348576		-24.8333	0.317079
	-64.6667	0.407762		-17.6667	0.31684		-59.57	0.198551		-9.66667	0.323247		-24.6667	0.321755
	-64.5	0.424129		-17.5	0.31684		-59.4033	0.192706		-9.5	0.342731		-24.5	0.321755
	-64.3333	0.4101		-17.3333	0.323217		-59.2367	0.198551		-9.33333	0.340783		-24.3333	0.312403
	-64.1667	0.426467		-17.1667	0.321091		-59.07	0.2005		-9.16667	0.34468		-24.1667	0.319417
	-64	0.407762		-17	0.31684		-58.9033	0.198551		-9	0.336886		-24	0.319417
	-63.8333	0.414777		-16.8333	0.321951		-58.73	0.196603		-8.83333	0.338834		-23.8333	0.331108
	-63.6667	0.407762		-16.6667	0.318966		-58.57	0.196603		-8.66667	0.346628		-23.6667	0.324093
	-63.5	0.426467		-16.5	0.333844		-58.4033	0.196603		-8.5	0.321299		-23.5	0.324093
	-63.3333	0.428805		-16.3333	0.315575		-58.2367	0.202448		-8.33333	0.342731		-23.3333	0.342798
	-63.1667	0.424129		-16.1667	0.321951		-58.07	0.194655		-8.16667	0.338834		-23.1667	0.32877
	-63	0.427115		-16	0.324077		-57.9033	0.196603		-8	0.34468		-23	0.342798
	-62.8333	0.429453		-15.8333	0.319826		-57.7333	0.192706		-7.83333	0.338834		-22.8333	0.32877
	-62.6667	0.427115		-15.6667	0.341081		-57.57	0.194655		-7.66667	0.331041		-22.6667	0.32877
	-62.5	0.429453		-15.5	0.332579		-57.4033	0.192706		-7.5	0.338834		-22.5	0.331108
	-62.3333	0.410748		-15.3333	0.332579		-57.2367	0.2005		-7.33333	0.338834		-22.3333	0.335784
	-62.1667	0.40841		-15.1667	0.341081		-57.07	0.198551		-7.16667	0.346628		-22.1667	0.338122
	-62	0.429453		-15	0.328328		-56.9033	0.198551		-7	0.34468		-22	0.331108
	-61.8333	0.429453		-14.8333	0.33683		-56.7333	0.194655		-6.83333	0.338834		-21.8333	0.335784
	-61.6667	0.410748		-14.6667	0.328328		-56.57	0.192706		-6.66667	0.354422		-21.6667	0.34046
	-61.5	0.40841		-14.5	0.332579		-56.4033	0.198551		-6.5	0.34468		-21.5	0.342798
	-61.3333	0.427115		-14.3333	0.319826		-56.2367	0.196603		-6.33333	0.346628		-21.3333	0.342798
	-61.1667	0.429453		-14.1667	0.33683		-56.07	0.194655		-6.16667	0.34468		-21.1667	0.338122
	-61	0.427115		-14	0.334705		-55.9033	0.196603		-6	0.354422		-21	0.345136
	-60.8333	0.427115		-13.8333	0.334705		-55.73	0.192706		-5.83333	0.354422		-20.8333	0.345136
	-60.6667	0.427115		-13.6667	0.326202		-55.57	0.196603		-5.66667	0.331041		-20.6667	0.376179
	-60.5	0.429453		-13.5	0.332579		-55.4	0.196603		-5.5	0.352473		-20.5	0.347474
	-60.3333	0.413086		-13.3333	0.33683		-55.2367	0.192706		-5.33333	0.342731		-20.3333	0.352151
	-60.1667	0.415424		-13.1667	0.33683		-55.07	0.186861		-5.16667	0.362215		-20.1667	0.354489
	-60	0.410748		-13	0.338956		-54.9033	0.186861		-5	0.345717		-20	0.354489
	-59.8333	0.427115		-12.8333	0.33683		-54.7367	0.192706		-4.83333	0.346628		-19.8333	0.362151
	-59.6667	0.431791		-12.6667	0.338956		-54.57	0.192706		-4.66667	0.348576		-19.6667	0.359165
	-59.5	0.429453		-12.5	0.338956		-54.4033	0.192706		-4.5	0.347665		-19.5	0.361503
	-59.3333	0.427115		-12.3333	0.338956		-54.2367	0.184913		-4.33333	0.346628		-19.3333	0.369165
	-59.1667	0.427115		-12.1667	0.343207		-54.07	0.190758		-4.16667	0.357407		-19.1667	0.363841
	-59	0.417762		-12	0.35596		-53.9033	0.194655		-4	0.355459		-19	0.366179
	-58.8333	0.427115		-11.8333	0.338956		-53.7333	0.184913		-3.83333	0.355459		-18.8333	0.366827
	-58.6667	0.427115		-11.6667	0.343207		-53.57	0.186861		-3.66667	0.355459		-18.6667	0.366827
	-58.5	0.417762		-11.5	0.345332		-53.4033	0.191795		-3.5	0.357407		-18.5	0.369165
	-58.3333	0.410748		-11.3333	0.345332		-53.2367	0.187898		-3.33333	0.355459		-18.3333	0.369165
	-58.1667	0.429453		-11.1667	0.351709		-53.07	0.192706		-3.16667	0.357407		-18.1667	0.366827
	-58	0.427115		-11	0.343207		-52.9033	0.194655		-3	0.369098		-18	0.378517
	-57.8333	0.429453		-10.8333	0.338956		-52.7367	0.186861		-2.83333	0.357407		-17.8333	0.380856
	-57.6667	0.431791		-10.6667	0.341081		-52.57	0.19764		-2.66667	0.359356		-17.6667	0.383194
	-57.5	0.429453		-10.5	0.349583		-52.4033	0.193744		-2.5	0.361304		-17.5	0.383194
	-57.3333	0.434129		-10.3333	0.346193		-52.2367	0.182053		-2.33333	0.357407		-17.3333	0.380856
	-57.1667	0.427115		-10.1667	0.352569		-52.07	0.195692		-2.16667	0.359356		-17.1667	0.383194
	-57	0.429453		-10	0.354695		-51.9033	0.215176		-2	0.361304		-17	0.380856
	-56.8333	0.427115		-9.83333	0.352569		-51.7367	0.184001		-1.83333	0.372995		-16.8333	0.385532
	-56.6667	0.429453		-9.66667	0.354695		-51.57	0.193744		-1.66667	0.363253		-16.6667	0.383194
	-56.5	0.427115		-9.5	0.350444		-51.4033	0.187898		-1.5	0.365201		-16.5	0.383194
	-56.3333	0.429453		-9.33333	0.348318		-51.2367	0.189847		-1.33333	0.363253		-16.3333	0.397222
	-56.1667	0.429453		-9.16667	0.354695		-51.07	0.187898		-1.16667	0.363253		-16.1667	0.38787
	-56	0.427115		-9	0.352569		-50.9033	0.182053		-1	0.372995		-16	0.397222
	-55.8333	0.434129		-8.83333	0.354695		-50.7367	0.18595		-0.833333	0.36715		-15.8333	0.390208
	-55.6667	0.44582		-8.66667	0.352569		-50.57	0.187898		-0.666667	0.363253		-15.6667	0.392546
	-55.5	0.44582		-8.5	0.346193		-50.4033	0.187898		-0.5	0.374943		-15.5	0.392546
	-55.3333	0.427115		-8.33333	0.354695		-50.2367	0.189847		-0.333333	0.363253		-15.3333	0.39956
	-55.1667	0.441143		-8.16667	0.348318		-50.07	0.193744		-0.166667	0.363253		-15.1667	0.406575
	-55	0.44582		-8	0.339816		-49.9033	0.187898		-1.42109e-13	0.372995		-15	0.397222
	-54.8333	0.429453		-7.83333	0.346193		-49.7367	0.189847		0.166667	0.371046		-14.8333	0.39956
	-54.6667	0.429453		-7.66667	0.358946		-49.57	0.189847		0.333333	0.372995		-14.6667	0.385532
	-54.5	0.429453		-7.5	0.363197		-49.4033	0.193744		0.5	0.371046		-14.5	0.38787
	-54.3333	0.44582		-7.33333	0.354695		-49.2367	0.19764		0.666667	0.365201		-14.3333	0.385532
	-54.1667	0.448158		-7.16667	0.354695		-49.07	0.18595		0.833333	0.374943		-14.1667	0.404237
	-54	0.448158		-7	0.37595		-48.9033	0.189847		1	0.349614		-14	0.38787
	-53.8333	0.429453		-6.83333	0.361071		-48.7367	0.187898		1.16667	0.361304		-13.8333	0.404237
	-53.6667	0.441143		-6.66667	0.358946		-48.57	0.18595		1.33333	0.355459		-13.6667	0.397222
	-53.5	0.429453		-6.5	0.361071		-48.4033	0.187898		1.5	0.36715		-13.5	0.397222
	-53.3333	0.431791		-6.33333	0.361071		-48.2367	0.189847		1.66667	0.372995		-13.3333	0.397222
	-53.1667	0.436467		-6.16667	0.363197		-48.07	0.195692		1.83333	0.357407		-13.1667	0.401898
	-53	0.429453		-6	0.358946		-47.9033	0.18595		2	0.359356		-13	0.404237
	-52.8333	0.427115		-5.83333	0.363197		-47.7367	0.189847		2.16667	0.355459		-12.8333	0.401898
	-52.6667	0.436467		-5.66667	0.363197		-47.57	0.189847		2.33333	0.357407		-12.6667	0.422941
	-52.5	0.429453		-5.5	0.361071		-47.4033	0.189847		2.5	0.361304		-12.5	0.415927
	-52.3333	0.44582		-5.33333	0.365322		-47.2367	0.193744		2.67	0.374943		-12.3333	0.415927
	-52.1667	0.455172		-5.16667	0.365322		-47.07	0.193744		2.83333	0.365201		-12.1667	0.408913
	-52	0.448158		-5	0.371699		-46.9033	0.189847		3	0.372995		-12	0.413589
	-51.8333	0.429453		-4.83333	0.384452		-46.7367	0.189847		3.16667	0.365201		-11.8333	0.411251
	-51.6667	0.451143		-4.66667	0.365322		-46.57	0.189847		3.33333	0.372995		-11.6667	0.408913
	-51.5	0.448158		-4.5	0.361071		-46.4033	0.187898		3.5	0.380788		-11.5	0.420603
	-51.3333	0.466863		-4.33333	0.373825		-46.2367	0.193744		3.66667	0.380788		-11.3333	0.422941
	-51.1667	0.44582		-4.16667	0.365322		-46.07	0.193744		3.83333	0.365201		-11.1667	0.418265
	-51	0.448158		-4	0.369574		-45.9033	0.195692		4	0.361304		-11	0.415927
	-50.8333	0.44582		-3.83333	0.363197		-45.7367	0.18595		4.16667	0.365201		-10.8333	0.432294
	-50.6667	0.437115		-3.66667	0.371699		-45.57	0.199589		4.33333	0.359356		-10.6667	0.422941
	-50.5	0.448805		-3.5	0.373825		-45.4033	0.19764		4.5	0.361304		-10.5	0.425279
	-50.3333	0.448158		-3.33333	0.369574		-45.2367	0.203486		4.66667	0.361304		-10.3333	0.425279
	-50.1667	0.448805		-3.16667	0.37595		-45.07	0.201537		4.83333	0.359356		-10.1667	0.425279
	-50	0.448158		-3	0.378936		-44.9033	0.211279		5	0.379877		-10	0.434632
	-49.8333	0.450496		-2.83333	0.371699		-44.7367	0.203486		5.16667	0.368187		-9.83333	0.432294
	-49.6667	0.448158		-2.66667	0.374685		-44.57	0.187898		5.33333	0.375981		-9.66667	0.434632
	-49.5	0.451143		-2.5	0.373825		-44.4033	0.19764		5.5	0.390531		-9.5	0.434632
	-49.3333	0.448158		-2.33333	0.374685		-44.2367	0.203486		5.66667	0.370135		-9.33333	0.443984
	-49.1667	0.448158		-2.16667	0.37595		-44.07	0.19764		5.83333	0.36715		-9.16667	0.441646
	-49	0.451143		-2	0.378936		-43.9033	0.199589		6	0.360393		-9	0.43697
	-48.8333	0.44582		-1.83333	0.378936		-43.7333	0.199589		6.16667	0.366238		-8.83333	0.434632
	-48.6667	0.448158		-1.66667	0.372559		-43.57	0.195692		6.33333	0.370135		-8.66667	0.432294
	-48.5	0.444129		-1.5	0.381061		-43.4033	0.201537		6.5	0.371046		-8.5	0.427618
	-48.3333	0.44582		-1.33333	0.372559		-43.2367	0.199589		6.66667	0.379877		-8.33333	0.434632
	-48.1667	0.458158		-1.16667	0.374685		-43.07	0.203486		6.83333	0.374032		-8.16667	0.422941
	-48	0.450496		-1	0.374685		-42.9	0.204523		7	0.377929		-8	0.434632
	-47.8333	0.451143		-0.833333	0.37681		-42.7367	0.204523		7.16667	0.375981		-7.83333	0.439308
	-47.6667	0.462834		-0.666667	0.37681		-42.57	0.199589		7.33333	0.379877		-7.66667	0.439308
	-47.5	0.45582		-0.5	0.37681		-42.4033	0.199589		7.5	0.379877		-7.5	0.439308
	-47.3333	0.458158		-0.333333	0.37681		-42.2367	0.205434		7.66667	0.379877		-7.33333	0.443984
	-47.1667	0.469848		-0.166667	0.374685		-42.07	0.205434		7.83333	0.383774		-7.16667	0.443984
	-47	0.46751		-1.13687e-13	0.378936		-41.9033	0.205434		8	0.381826		-7	0.441646
	-46.8333	0.451143		0.166667	0.37681		-41.7333	0.203486		8.16667	0.381826		-6.83333	0.443984
	-46.6667	0.451143		0.333333	0.381061		-41.57	0.214265		8.33333	0.375981		-6.66667	0.443984
	-46.5	0.453482		0.5	0.381061		-41.4033	0.20842		8.5	0.375981		-6.5	0.441646
	-46.3333	0.464524		0.666667	0.393815		-41.2367	0.203486		8.66667	0.379877		-6.33333	0.450999
	-46.1667	0.46751		0.833333	0.39594		-41.07	0.210368		8.83333	0.370135		-6.16667	0.460351
	-46	0.46751		1	0.381061		-40.9033	0.204523		9	0.381826		-6	0.443984
	-45.8333	0.469848		1.16667	0.391689		-40.7367	0.204523		9.16667	0.377929		-5.83333	0.443984
	-45.6667	0.472186		1.33333	0.381061		-40.57	0.204523		9.33333	0.393516		-5.66667	0.446322
	-45.5	0.46751		1.5	0.385313		-40.4033	0.200626		9.5	0.370135		-5.5	0.443984
	-45.3333	0.469848		1.66667	0.391689		-40.2367	0.212317		9.66667	0.374032		-5.33333	0.443984
	-45.1667	0.466863		1.83333	0.402317		-40.07	0.195692		9.83333	0.381826		-5.16667	0.460351
	-45	0.46751		2	0.381061		-39.9033	0.199589		10	0.381826		-5	0.453337
	-44.8333	0.469848		2.16667	0.381061		-39.7333	0.196729		10.1667	0.389619		-4.83333	0.453337
	-44.6667	0.469848		2.33333	0.391689		-39.57	0.206471		10.3333	0.379877		-4.66667	0.453337
	-44.5	0.469848		2.5	0.402317		-39.4033	0.206471		10.5	0.385723		-4.5	0.443984
	-44.3333	0.469848		2.66667	0.391689		-39.2367	0.204523		10.6667	0.391568		-4.33333	0.469703
	-44.1667	0.46751		2.83333	0.385313		-39.07	0.200626		10.8333	0.377929		-4.16667	0.460351
	-44	0.46751		3	0.389564		-38.9033	0.198678		11	0.393516		-4	0.455675
	-43.8333	0.469848		3.16667	0.391689		-38.7333	0.204523		11.1667	0.377929		-3.83333	0.460351
	-43.6667	0.481539		3.33333	0.39594		-38.57	0.198678		11.3333	0.383774		-3.66667	0.453337
	-43.5	0.469848		3.5	0.391689		-38.4033	0.202575		11.5	0.383774		-3.5	0.455675
	-43.3333	0.476863		3.66667	0.387438		-38.2367	0.204523		11.6667	0.379877		-3.33333	0.460351
	-43.1667	0.486215		3.83333	0.385313		-38.07	0.204523		11.8333	0.375981		-3.16667	0.455675
	-43	0.488553		4	0.391689		-37.9033	0.206471		12	0.391568		-3	0.462689
	-42.8333	0.488553		4.16667	0.39594		-37.7333	0.204523		12.1667	0.381826		-2.83333	0.469703
	-42.6667	0.488553		4.33333	0.39594		-37.57	0.206471		12.3333	0.377929		-2.66667	0.458013
	-42.5	0.469848		4.5	0.393815		-37.4033	0.196729		12.5	0.389619		-2.5	0.47438
	-42.3333	0.488553		4.66667	0.391689		-37.2367	0.20842		12.6667	0.385723		-2.33333	0.458013
	-42.1667	0.474524		4.83333	0.393815		-37.07	0.206471		12.8333	0.377929		-2.16667	0.453337
	-42	0.488553		5	0.391689		-36.9033	0.202575		13	0.379877		-2	0.462689
	-41.8333	0.474524		5.16667	0.39594		-36.7333	0.202575		13.1667	0.377929		-1.83333	0.453984
	-41.6667	0.486215		5.33333	0.389564		-36.57	0.206471		13.3333	0.383774		-1.66667	0.462689
	-41.5	0.488553		5.5	0.391689		-36.4033	0.206471		13.5	0.389619		-1.5	0.481394
	-41.3333	0.488553		5.66667	0.389564		-36.2367	0.212317		13.6667	0.375981		-1.33333	0.472041
	-41.1667	0.488553		5.83333	0.39594		-36.07	0.20842		13.8333	0.375981		-1.16667	0.460351
	-41	0.495567		6	0.387438		-35.9033	0.206471		14	0.377929		-1	0.469703
	-40.8333	0.486215		6.16667	0.39594		-35.7333	0.216213		14.1667	0.377929		-0.833333	0.468013
	-40.6667	0.507258		6.33333	0.391689		-35.57	0.214265		14.3333	0.375981		-0.666667	0.469703
	-40.5	0.507258		6.5	0.398066		-35.4033	0.216213		14.5	0.375981		-0.5	0.460351
	-40.3333	0.488553		6.66667	0.400191		-35.2367	0.206471		14.6667	0.381826		-0.333333	0.475027
	-40.1667	0.495567		6.83333	0.393815		-35.07	0.218162		14.8333	0.383774		-0.166667	0.47438
	-40	0.488553		7	0.396801		-34.9033	0.20842		15	0.385723		-2.55795e-13	0.472041
	-39.8333	0.490891		7.16667	0.394675		-34.7333	0.222059		15.1667	0.379877		0.166667	0.47438
	-39.6667	0.488553		7.33333	0.398926		-34.57	0.214265		15.3333	0.379877		0.333333	0.481394
	-39.5	0.50492		7.5	0.396801		-34.4033	0.216213		15.5	0.383774		0.5	0.482041
	-39.3333	0.50492		7.66667	0.401052		-34.2367	0.22011		15.6667	0.385723		0.666667	0.476718
	-39.1667	0.50492		7.83333	0.398926		-34.07	0.206471		15.8333	0.383774		0.833333	0.476718
	-39	0.507258		8	0.393815		-33.9033	0.214265		16	0.391568		1	0.476718
	-38.8333	0.50492		8.16667	0.401052		-33.7333	0.216213		16.1667	0.383774		1.16667	0.483732
	-38.6667	0.523625		8.33333	0.39594		-33.57	0.218162		16.3333	0.391568		1.33333	0.486718
	-38.5	0.507258		8.5	0.398926		-33.4033	0.218162		16.5	0.395465		1.5	0.483732
	-38.3333	0.50492		8.66667	0.401052		-33.2367	0.218162		16.6667	0.391568		1.66667	0.483732
	-38.1667	0.525963		8.83333	0.394675		-33.0667	0.222059		16.8333	0.393516		1.83333	0.49607
	-38	0.50492		9	0.403177		-32.9033	0.222059		17	0.397413		2	0.49607
	-37.8333	0.523625		9.16667	0.403177		-32.7333	0.229852		17.1667	0.395465		2.16667	0.481394
	-37.6667	0.511934		9.33333	0.403177		-32.57	0.222059		17.3333	0.389619		2.33333	0.486718
	-37.5	0.523625		9.5	0.401052		-32.4033	0.22011		17.5	0.391568		2.5	0.488408
	-37.3333	0.525963		9.66667	0.401052		-32.2367	0.222059		17.6667	0.391568		2.66667	0.486718
	-37.1667	0.523625		9.83333	0.401052		-32.07	0.227904		17.8333	0.393516		2.83333	0.500746
	-37	0.525963		10	0.403177		-31.9033	0.227904		18	0.395465		3	0.486718
	-36.8333	0.523625		10.1667	0.401052		-31.73	0.222059		18.1667	0.393516		3.16667	0.505422
	-36.6667	0.523625		10.3333	0.401052		-31.57	0.227904		18.3333	0.397413		3.33333	0.493732
	-36.5	0.525963		10.5	0.401052		-31.4033	0.227904		18.5	0.396502		3.5	0.507761
	-36.3333	0.511934		10.6667	0.396801		-31.2367	0.229852		18.6667	0.399362		3.66667	0.521789
	-36.1667	0.525963		10.8333	0.394675		-31.07	0.229852		18.8333	0.39845		3.83333	0.490746
	-36	0.525963		11	0.409554		-30.9033	0.227904		19	0.405207		4	0.500746
	-35.8333	0.523625		11.1667	0.398926		-30.7333	0.229852		19.1667	0.402347		4.16667	0.49607
	-35.6667	0.530639		11.3333	0.396801		-30.57	0.229852		19.3333	0.397413		4.33333	0.49607
	-35.5	0.525963		11.5	0.411679		-30.4033	0.233749		19.5	0.404296		4.5	0.495422
	-35.3333	0.535315		11.6667	0.41593		-30.2367	0.235698		19.6667	0.411052		4.66667	0.498408
	-35.1667	0.532977		11.8333	0.411679		-30.07	0.237646		19.8333	0.402347		4.83333	0.511789
	-35	0.530639		12	0.411679		-29.9033	0.237646		20	0.404296		5	0.500746
	-34.8333	0.535315		12.1667	0.411679		-29.7333	0.239595		20.1667	0.402347		5.16667	0.505422
	-34.6667	0.542329		12.3333	0.411679		-29.57	0.24258		20.3333	0.404296		5.33333	0.503084
	-34.5	0.528301		12.5	0.403177		-29.4033	0.246477		20.5	0.402347		5.5	0.500746
	-34.3333	0.542329		12.6667	0.420182		-29.2367	0.24258		20.6667	0.412089		5.66667	0.505422
	-34.1667	0.544668		12.8333	0.418056		-29.07	0.246477		20.8333	0.410141		5.83333	0.503084
	-34	0.544668		13	0.409554		-28.9033	0.248426		21	0.404296		6	0.510099
	-33.8333	0.544668		13.1667	0.413805		-28.7333	0.248426		21.1667	0.408193		6.16667	0.510099
	-33.6667	0.544668		13.3333	0.411679		-28.57	0.248426		21.3333	0.408193		6.33333	0.512437
	-33.5	0.556358		13.5	0.403177		-28.4033	0.246477		21.5	0.410141		6.5	0.510099
	-33.3333	0.544668		13.6667	0.401052		-28.2367	0.251285		21.6667	0.408193		6.66667	0.512437
	-33.1667	0.542329		13.8333	0.413805		-28.07	0.250374		21.8333	0.408193		6.83333	0.521789
	-33	0.547006		14	0.413805		-27.9033	0.250374		22	0.412089		7	0.519451
	-32.8333	0.561034		14.1667	0.407428		-27.7367	0.256219		22.1667	0.412089		7.16667	0.514775
	-32.6667	0.547006		14.3333	0.413805		-27.57	0.256219		22.3333	0.408193		7.33333	0.512437
	-32.5	0.56571		14.5	0.405303		-27.4033	0.258168		22.5	0.404296		7.5	0.519451
	-32.3333	0.561034		14.6667	0.411679		-27.2367	0.262064		22.6667	0.408193		7.66667	0.519451
	-32.1667	0.563372		14.8333	0.401052		-27.07	0.265961		22.8333	0.410141		7.83333	0.521789
	-32	0.561034		15	0.401052		-26.9033	0.262064		23	0.415986		8	0.524127
	-31.8333	0.556358		15.1667	0.398926		-26.7367	0.258168		23.1667	0.412089		8.16667	0.528803
	-31.6667	0.556358		15.3333	0.405303		-26.57	0.265961		23.3333	0.410141		8.33333	0.524127
	-31.5	0.561034		15.5	0.411679		-26.4033	0.2796		23.5	0.410141		8.5	0.524127
	-31.3333	0.563372		15.6667	0.398926		-26.2367	0.264013		23.6667	0.412089		8.66667	0.524127
	-31.1667	0.561034		15.8333	0.403177		-26.07	0.265961		23.8333	0.415986		8.83333	0.542832
	-31	0.563372		16	0.409554		-25.9033	0.264013		24	0.414038		9	0.531142
	-30.8333	0.563372		16.1667	0.418056		-25.7367	0.269858		24.1667	0.414038		9.16667	0.535818
	-30.6667	0.582077		16.3333	0.403177		-25.57	0.264013		24.3333	0.414038		9.33333	0.531142
	-30.5	0.563372		16.5	0.411679		-25.4033	0.297136		24.5	0.414038		9.5	0.53348
	-30.3333	0.563372		16.6667	0.407428		-25.2367	0.269858		24.6667	0.415986		9.66667	0.535818
	-30.1667	0.584415		16.8333	0.401052		-25.07	0.265961		24.8333	0.414038		9.83333	0.535818
	-30	0.579739		17	0.409554		-24.9033	0.265961		25	0.419883		10	0.53348
	-29.8333	0.584415		17.1667	0.409554		-24.7367	0.271807		25.1667	0.419883		10.1667	0.549846
	-29.6667	0.579739		17.3333	0.41593		-24.57	0.269858		25.3333	0.417935		10.3333	0.535818
	-29.5	0.582077		17.5	0.413805		-24.4033	0.26791		25.5	0.419883		10.5	0.547508
	-29.3333	0.584415		17.6667	0.413805		-24.2367	0.26791		25.6667	0.419883		10.6667	0.549846
	-29.1667	0.607796		17.8333	0.409554		-24.07	0.26791		25.8333	0.419883		10.8333	0.540494
	-29	0.582077		18	0.407428		-23.9033	0.26791		26	0.42378		11	0.54517
	-28.8333	0.589091		18.1667	0.411679		-23.7367	0.26791		26.1667	0.42378		11.1667	0.549846
	-28.6667	0.600782		18.3333	0.411679		-23.57	0.269858		26.3333	0.42378		11.3333	0.549846
	-28.5	0.582077		18.5	0.409554		-23.4	0.2796		26.5	0.425728		11.5	0.561537
	-28.3333	0.589091		18.6667	0.413805		-23.2367	0.277652		26.6667	0.433522		11.6667	0.556861
	-28.1667	0.600782		18.8333	0.413805		-23.07	0.283497		26.8333	0.425728		11.8333	0.570889
	-28	0.59143		19	0.420182		-22.9033	0.273755		27	0.419883		12	0.559199
	-27.8333	0.598444		19.1667	0.413805		-22.7367	0.271807		27.1667	0.419883		12.1667	0.556861
	-27.6667	0.584415		19.3333	0.405303		-22.57	0.277652		27.3333	0.417935		12.3333	0.568551
	-27.5	0.600782		19.5	0.405303		-22.4033	0.269858		27.5	0.417935		12.5	0.568551
	-27.3333	0.60312		19.6667	0.407428		-22.2367	0.2796		27.6667	0.419883		12.6667	0.575566
	-27.1667	0.600782		19.8333	0.413805		-22.07	0.2796		27.8333	0.425728		12.8333	0.568551
	-27	0.617149		20	0.411679		-21.9033	0.2796		28	0.425728		13	0.573227
	-26.8333	0.617149		20.1667	0.403177		-21.73	0.273755		28.1667	0.425728		13.1667	0.566213
	-26.6667	0.612472		20.3333	0.403177		-21.57	0.2796		28.3333	0.417935		13.3333	0.570889
	-26.5	0.617149		20.5	0.409554		-21.4033	0.283497		28.5	0.42378		13.5	0.584918
	-26.3333	0.619487		20.6667	0.401052		-21.2367	0.281549		28.6667	0.429625		13.6667	0.577904
	-26.1667	0.617149		20.8333	0.403177		-21.07	0.283497		28.8333	0.427677		13.8333	0.575566
	-26	0.617149		21	0.411679		-20.9033	0.283497		29	0.429625		14	0.570889
	-25.8333	0.619487		21.1667	0.403177		-20.7367	0.2796		29.1667	0.419883		14.1667	0.589594
	-25.6667	0.617149		21.3333	0.411679		-20.57	0.281549		29.3333	0.427677		14.3333	0.587256
	-25.5	0.626501		21.5	0.403177		-20.4033	0.277652		29.5	0.429625		14.5	0.587256
	-25.3333	0.619487		21.6667	0.401052		-20.2367	0.283497		29.6667	0.427677		14.6667	0.580242
	-25.1667	0.619487		21.8333	0.396801		-20.07	0.281549		29.8333	0.429625		14.8333	0.577904
	-25	0.619487		22	0.411679		-19.9033	0.287394		30	0.433522		15	0.591932
	-24.8333	0.635853		22.1667	0.398926		-19.7367	0.281549		30.1667	0.431574		15.1667	0.589594
	-24.6667	0.619487		22.3333	0.401052		-19.57	0.281549		30.3333	0.431574		15.3333	0.587256
	-24.5	0.635853		22.5	0.413805		-19.4033	0.287394		30.5	0.425728		15.5	0.587256
	-24.3333	0.635853		22.6667	0.401052		-19.2367	0.2796		30.6667	0.431574		15.6667	0.591932
	-24.1667	0.638192		22.8333	0.403177		-19.07	0.288431		30.8333	0.439367		15.8333	0.587256
	-24	0.635853		23	0.403177		-18.9033	0.287394		31	0.441316		16	0.591932
	-23.83	0.638192		23.1667	0.396801		-18.7367	0.295188		31.1667	0.427677		16.1667	0.59427
	-23.6667	0.635853		23.3333	0.398926		-18.57	0.285445		31.3333	0.433522		16.3333	0.59427
	-23.5	0.635853		23.5	0.403177		-18.4033	0.293239		31.5	0.433522		16.5	0.59427
	-23.3333	0.645206		23.6667	0.399786		-18.2367	0.283497		31.6667	0.431574		16.6667	0.605961
	-23.1667	0.638192		23.8333	0.398926		-18.07	0.301033		31.8333	0.431574		16.8333	0.596608
	-23	0.656896		24	0.396801		-17.9033	0.299084		32	0.431574		17	0.603623
	-22.8333	0.656896		24.1667	0.396801		-17.7333	0.295188		32.1667	0.433522		17.1667	0.596608
	-22.6667	0.654558		24.3333	0.401052		-17.57	0.300122		32.3333	0.433522		17.3333	0.59427
	-22.5	0.656896		24.5	0.401052		-17.4033	0.293239		32.5	0.433522		17.5	0.598947
	-22.3333	0.654558		24.6667	0.398926		-17.2367	0.297136		32.6667	0.433522		17.6667	0.598947
	-22.1667	0.638192		24.8333	0.396801		-17.07	0.302981		32.8333	0.43547		17.8333	0.608299
	-22	0.656896		25	0.396801		-16.9033	0.301033		33	0.441316		18	0.603623
	-21.8333	0.659234		25.1667	0.399786		-16.7367	0.301033		33.1667	0.43547		18.1667	0.605961
	-21.6667	0.663911		25.3333	0.399786		-16.57	0.301033		33.3333	0.439367		18.3333	0.605961
	-21.5	0.661573		25.5	0.404037		-16.4033	0.301033		33.5	0.441316		18.5	0.605961
	-21.3333	0.675601		25.6667	0.401912		-16.2367	0.302981		33.6667	0.433522		18.6667	0.603623
	-21.1667	0.673263		25.8333	0.401912		-16.07	0.304019		33.8333	0.439367		18.8333	0.605961
	-21	0.656896		26	0.401052		-15.9033	0.311812		34	0.433522		19	0.608299
	-20.8333	0.673263		26.1667	0.407428		-15.7333	0.308826		34.1667	0.439367		19.1667	0.615313
	-20.6667	0.661573		26.3333	0.401052		-15.57	0.313761		34.3333	0.439367		19.3333	0.603623
	-20.5	0.673263		26.5	0.397661		-15.4033	0.302981		34.5	0.43547		19.5	0.605961
	-20.3333	0.675601		26.6667	0.404037		-15.2367	0.315709		34.6667	0.43547		19.6667	0.605961
	-20.1667	0.673263		26.8333	0.397661		-15.07	0.311812		34.8333	0.439367		19.8333	0.605961
	-20	0.694306		27	0.395535		-14.9033	0.307915		35	0.43547		20	0.610637
	-19.8333	0.673263		27.1667	0.397661		-14.7367	0.313761		35.1667	0.43547		20.1667	0.608299
	-19.6667	0.698982		27.3333	0.401912		-14.57	0.313761		35.3333	0.441316		20.3333	0.615313
	-19.5	0.694306		27.5	0.401052		-14.4033	0.310775		35.5	0.442353		20.5	0.610637
	-19.3333	0.694306		27.6667	0.396801		-14.2367	0.310775		35.6667	0.443264		20.6667	0.617651
	-19.1667	0.691968		27.8333	0.397661		-14.07	0.312723		35.8333	0.443264		20.8333	0.612975
	-19	0.691968		28	0.397661		-13.9033	0.315709		36	0.444301		21	0.615313
	-18.8333	0.694306		28.1667	0.389159		-13.7333	0.313761		36.1667	0.441316		21.1667	0.617651
	-18.6667	0.694306		28.3333	0.380656		-13.57	0.315709		36.3333	0.44625		21.3333	0.629342
	-18.5	0.710673		28.5	0.397661		-13.4033	0.315709		36.5	0.447161		21.5	0.610637
	-18.3333	0.696644		28.6667	0.391284		-13.2367	0.313761		36.6667	0.447161		21.6667	0.622328
	-18.1667	0.694306		28.8333	0.395535		-13.07	0.317657		36.8333	0.450147		21.8333	0.615313
	-18	0.70132		29	0.406163		-12.9033	0.317657		37	0.449109		22	0.624666
	-17.8333	0.705996		29.1667	0.384907		-12.7333	0.317657		37.17	0.454955		22.1667	0.617651
	-17.6667	0.715349		29.3333	0.397661		-12.57	0.317657		37.3333	0.449109		22.3333	0.622328
	-17.5	0.713658		29.5	0.397661		-12.4033	0.321554		37.5	0.451058		22.5	0.622328
	-17.3333	0.717687		29.6667	0.395535		-12.2367	0.323503		37.6667	0.449109		22.6667	0.629342
	-17.1667	0.713011		29.8333	0.395535		-12.07	0.323503		37.8367	0.449109		22.8333	0.622328
	-17	0.713011		30	0.389159		-11.9033	0.323503		38	0.451058		23	0.63168
	-16.8333	0.713658		30.1667	0.395535		-11.7333	0.329348		38.1667	0.45794		23.1667	0.63168
	-16.6667	0.713658		30.3333	0.395535		-11.57	0.321554		38.3333	0.45794		23.3333	0.629342
	-16.5	0.723011		30.5	0.389159		-11.4033	0.325451		38.5033	0.459889		23.5	0.63168
	-16.3333	0.713011		30.6667	0.39341		-11.2367	0.3274		38.6667	0.461837		23.6667	0.636356
	-16.1667	0.732363		30.8333	0.39341		-11.07	0.333245		38.8367	0.456903		23.8333	0.652723
	-16	0.718335		31	0.391284		-10.9033	0.331296		39.0033	0.456903		24	0.64337
	-15.8333	0.715996		31.1667	0.397661		-10.7333	0.329348		39.1667	0.454955		24.1667	0.641032
	-15.6667	0.731716		31.3333	0.391284		-10.57	0.329348		39.3333	0.451058		24.3333	0.64337
	-15.5	0.713011		31.5	0.39341		-10.4033	0.333245		39.5	0.456903		24.5	0.64337
	-15.3333	0.720673		31.6667	0.397661		-10.2367	0.335193		39.6667	0.453006		24.6667	0.648047
	-15.1667	0.734701		31.8333	0.391284		-10.07	0.333245		39.8333	0.4608		24.8333	0.645709
	-15	0.732363		32	0.387033		-9.90333	0.33909		40	0.453006		25	0.648047
	-14.8333	0.734701		32.1667	0.387033		-9.73333	0.335193		40.1667	0.454044		25.1667	0.652723
	-14.6667	0.732363		32.3333	0.389159		-9.57	0.333245		40.3333	0.450147		25.3333	0.652723
	-14.5	0.734701		32.5	0.387033		-9.40333	0.335193		40.5	0.449109		25.5	0.648047
	-14.3333	0.751068		32.6667	0.39341		-9.23667	0.333245		40.6667	0.450147		25.6667	0.648047
	-14.1667	0.751068		32.8333	0.387033		-9.07	0.333245		40.8333	0.448198		25.8333	0.655061
	-14	0.753406		33	0.382782		-8.90333	0.344935		41	0.439367		26	0.648047
	-13.8333	0.753406		33.1667	0.382782		-8.73333	0.344935		41.1667	0.450147		26.1667	0.652723
	-13.6667	0.753406		33.3333	0.387033		-8.57	0.335193		41.3333	0.448198		26.3333	0.652723
	-13.5	0.751068		33.5	0.384907		-8.4	0.335193		41.5	0.44625		26.5	0.659737
	-13.3333	0.753406		33.6667	0.380656		-8.23667	0.342987		41.6667	0.450147		26.6667	0.655061
	-13.1667	0.751068		33.8333	0.380656		-8.07	0.337142		41.8333	0.44625		26.8333	0.659737
	-13	0.753406		34	0.380656		-7.90333	0.344935		42	0.44625		27	0.659737
	-12.8333	0.769773		34.1667	0.380656		-7.73667	0.344935		42.1667	0.448198		27.1667	0.662075
	-12.6667	0.793154		34.3333	0.370029		-7.57	0.344935		42.3333	0.44625		27.3333	0.664413
	-12.5	0.769773		34.5	0.372154		-7.40333	0.348832		42.5	0.442353		27.5	0.664413
	-12.3333	0.772111		34.6667	0.365778		-7.23667	0.350781		42.6667	0.452095		27.6667	0.66909
	-12.1667	0.755744		34.8333	0.367903		-7.07	0.346884		42.8333	0.444301		27.8333	0.66909
	-12	0.772111		35	0.378531		-6.90333	0.346884		43	0.448198		28	0.66909
	-11.8333	0.772111		35.1667	0.372154		-6.73333	0.346884		43.1667	0.448198		28.1667	0.66909
	-11.6667	0.772111		35.3333	0.365778		-6.57	0.350781		43.3333	0.44625		28.3333	0.671428
	-11.5	0.772111		35.5	0.370029		-6.40333	0.374162		43.5	0.448198		28.5	0.687794
	-11.3333	0.772111		35.6667	0.376405					43.6667	0.44625		28.6667	0.66909
	-11.1667	0.772111		35.8333	0.372154		-5.40333	0.351948		43.8333	0.450147		28.8333	0.671428
	-11	0.772111		36	0.363652		-5.23667	0.353897		44	0.448198		29	0.673766
	-10.8333	0.769773		36.1667	0.365778		-5.07	0.346103		44.1667	0.450147		29.1667	0.673766
	-10.6667	0.772111		36.3333	0.365778		-4.90333	0.348052		44.3333	0.452095		29.3333	0.678442
	-10.5	0.793154		36.5	0.363652		-4.73667	0.344155		44.5	0.450147		29.5	0.697147
	-10.3333	0.790816		36.6667	0.363652		-4.57	0.348052		44.6667	0.44625		29.6667	0.687794
	-10.1667	0.788478		36.8333	0.363652		-4.40333	0.346103		44.8367	0.44625		29.8333	0.68078
	-10	0.793154		37	0.35515		-4.23667	0.357794		45	0.454044		30	0.687794
	-9.83333	0.788478		37.1667	0.35515		-4.07	0.355845		45.1667	0.454044		30.1667	0.692471
	-9.66667	0.79783		37.3333	0.365778		-3.90333	0.359742		45.3333	0.455992		30.3333	0.685456
	-9.5	0.79783		37.5	0.365778		-3.73667	0.355845		45.5	0.452095		30.5	0.690132
	-9.33333	0.790816		37.6667	0.363652		-3.57	0.357794		45.6667	0.45794		30.6667	0.687794
	-9.16667	0.790816		37.8333	0.363652		-3.40333	0.361691		45.8333	0.454044		30.8333	0.701823
	-9	0.795492		38	0.35515		-3.23667	0.361691		46	0.454044		31	0.699485
	-8.83333	0.809521		38.1667	0.350899		-3.07	0.357794		46.1667	0.45794		31.1667	0.687794
	-8.66667	0.807182		38.3333	0.361526		-2.90333	0.373381		46.3333	0.459889		31.3333	0.692471
	-8.5	0.809521		38.5	0.348773		-2.73667	0.355845		46.5	0.459889		31.5	0.699485
	-8.33333	0.809521		38.6667	0.350899		-2.57	0.359742		46.6667	0.454044		31.6667	0.687794
	-8.16667	0.816535		38.8333	0.340271		-2.40333	0.355845		46.8333	0.452095		31.8333	0.690132
	-8	0.809521		39	0.344522		-2.23667	0.357794		47	0.45794		32	0.690132
	-7.83333	0.809521		39.1667	0.348773		-2.07	0.361691		47.1667	0.454044		32.1667	0.690132
	-7.66667	0.807182		39.3333	0.353024		-1.90333	0.361691		47.3333	0.452095		32.3333	0.690132
	-7.5	0.830563		39.5	0.346648		-1.73667	0.371433		47.5	0.459889		32.5	0.687794
	-7.33333	0.809521		39.6667	0.346648		-1.57	0.369484		47.6667	0.452095		32.6667	0.692471
	-7.16667	0.816535		39.8333	0.344522		-1.40333	0.371433		47.8333	0.454044		32.8333	0.706499
	-7	0.809521		40	0.344522		-1.23667	0.369484		48	0.448198		33	0.699485
	-6.83333	0.811859		40.1667	0.338145		-1.07	0.369484		48.1667	0.454044		33.1667	0.701823
	-6.66667	0.825887		40.3333	0.348773		-0.903333	0.367536		48.3333	0.450147		33.3333	0.704161
	-6.5	0.825887		40.5	0.348773		-0.736667	0.375329		48.5	0.450147		33.5	0.692471
	-6.33333	0.828225		40.6667	0.338145		-0.57	0.371433		48.6667	0.452095		33.6667	0.701823
	-6.16667	0.811859		40.8333	0.33602		-0.403333	0.371433		48.8333	0.452095		33.8333	0.706499
	-6	0.825887		41	0.348773		-0.236667	0.371433		49	0.455992		34	0.706499
	-5.83333	0.825887		41.1667	0.33602		-0.07	0.371433		49.1667	0.450147		34.1667	0.704161
	-5.66667	0.825887		41.3333	0.338145		0.0966667	0.371433		49.3333	0.448198		34.3333	0.708837
	-5.5	0.828225		41.5	0.338145		0.263333	0.379226		49.5	0.450147		34.5	0.727542
	-5.33333	0.828225		41.6667	0.33602		0.43	0.371433		49.6667	0.450147		34.6667	0.711175
	-5.16667	0.828225		41.8367	0.333894		0.596667	0.37417		49.8333	0.45794		34.8333	0.708837
	-5	0.830563		42	0.333894		0.763333	0.373381		50	0.452095		35	0.720528
	-4.83333	0.830563		42.1667	0.333894		0.93	0.375329		50.1667	0.450147		35.1667	0.711175
	-4.66667	0.828225		42.3333	0.333894		1.09667	0.37417		50.3333	0.454044		35.3333	0.720528
	-4.5	0.844592		42.5	0.331769		1.26333	0.373381		50.5	0.454044		35.5	0.722866
	-4.33333	0.828225		42.6667	0.329643		1.43	0.373381		50.6667	0.45794		35.6667	0.715852
	-4.16667	0.832902		42.8367	0.325392		1.59667	0.375329		50.8333	0.459889		35.8333	0.708837
	-4	0.837578		43	0.323267		1.76333	0.377278		51	0.452095		36	0.708837
	-3.83333	0.844592		43.1667	0.321141		1.93	0.38702		51.1667	0.452095		36.1667	0.711175
	-3.66667	0.84693		43.3333	0.319016		2.09667	0.377278		51.3333	0.452095		36.3333	0.715852
	-3.5	0.844592		43.5	0.329643		2.26333	0.377278		51.5	0.448198		36.5	0.722866
	-3.33333	0.844592		43.6667	0.329643		2.43	0.379226		51.6667	0.454044		36.6667	0.708837
	-3.16667	0.844592		43.8367	0.319016		2.59667	0.376118		51.8333	0.459889		36.8333	0.708837
	-3	0.84693		44	0.31689		2.76333	0.373381		52	0.452095		37	0.722866
	-2.83333	0.84693		44.1667	0.31689		2.93	0.369484		52.1667	0.459889		37.1667	0.708837
	-2.66667	0.84693		44.3333	0.319016		3.09667	0.37417		52.3333	0.45794		37.3333	0.708837
	-2.5	0.865635		44.5	0.321141		3.26333	0.373381		52.5	0.452095		37.5	0.708837
	-2.33333	0.865635		44.6667	0.31689		3.43	0.38702		52.6667	0.45794		37.6667	0.722866
	-2.16667	0.84693		44.8367	0.314764		3.59667	0.37417		52.8333	0.454044		37.8333	0.715852
	-2	0.860959		45	0.31689		3.76333	0.372221		53	0.459889		38	0.715852
	-1.83333	0.84693		45.1667	0.319016		3.93	0.380015		53.1667	0.459889		38.1667	0.715852
	-1.66667	0.865635		45.3333	0.319016		4.09667	0.373381		53.3333	0.454044		38.3333	0.715852
	-1.5	0.853944		45.5	0.312639		4.26333	0.376118		53.5	0.452095		38.5	0.706499
	-1.33333	0.844592		45.6667	0.312639		4.43	0.375329		53.6667	0.452095		38.6667	0.715852
	-1.16667	0.853944		45.8333	0.314764		4.59667	0.373381		53.8333	0.450147		38.8333	0.708837
	-1	0.867973		46	0.304137		4.76333	0.375329		54	0.444301		39	0.725204
	-0.833333	0.863297		46.1667	0.306262		4.93	0.376118		54.1667	0.452095		39.1667	0.706499
	-0.666667	0.863297		46.3333	0.312639		5.09667	0.377278		54.3333	0.452095		39.3333	0.708837
	-0.5	0.863297		46.5	0.302011		5.26333	0.371433		54.5	0.454044		39.5	0.706499
	-0.333333	0.865635		46.6667	0.312639		5.43	0.388968		54.6667	0.452095		39.6667	0.711175
	-0.166667	0.868621		46.8333	0.319016		5.59667	0.375329		54.8333	0.459889		39.8333	0.715852
	-1.13687e-13	0.865635		47	0.302011		5.76333	0.379226		55	0.452095		40	0.715852
	0.166667	0.865635		47.1667	0.312639		5.93	0.388968		55.1667	0.45794		40.1667	0.725204
	0.333333	0.877973		47.3333	0.287132		6.09667	0.383123		55.3333	0.467682		40.3333	0.711175
	0.5	0.863297		47.5	0.302011		6.26333	0.390917		55.5	0.461837		40.5	0.71819
	0.666667	0.866283		47.6667	0.299886		6.43	0.389757		55.6667	0.459889		40.6667	0.720528
	0.833333	0.868621		47.8367	0.295635		6.59667	0.387808		55.8333	0.459889		40.8333	0.711175
	1	0.868621		48	0.310513		6.76333	0.387808		56	0.459889		41	0.727542
	1.16667	0.866283		48.1667	0.299886		6.93	0.379226		56.1667	0.459889		41.1667	0.71819
	1.33333	0.868621		48.3333	0.299886		7.09667	0.383123		56.3333	0.463786		41.3333	0.720528
	1.5	0.868621		48.5	0.295635		7.26333	0.385071		56.5	0.463786		41.5	0.720528
	1.66667	0.866283		48.6667	0.291383		7.43	0.389757		56.6667	0.463786		41.6667	0.71819
	1.83333	0.866283		48.8333	0.293509		7.59667	0.383123		56.8333	0.467682		41.8333	0.725204
	2	0.884987		49	0.285007		7.76333	0.38586		57	0.461837		42	0.722866
	2.16667	0.887325		49.1667	0.289258		7.93	0.389757		57.1667	0.467682		42.1667	0.744556
	2.33333	0.868621		49.3333	0.289258		8.09667	0.383123		57.3333	0.461837		42.3333	0.722866
	2.5	0.887325		49.5	0.289258		8.26333	0.389757		57.5	0.469631		42.5	0.722866
	2.66667	0.884987		49.6667	0.302011		8.43	0.383912		57.6667	0.467682		42.6667	0.725204
	2.83333	0.887325		49.8367	0.282881		8.59667	0.379226		57.8367	0.467682		42.8333	0.725204
	3	0.868621		50	0.285007		8.76333	0.379226		58	0.465734		43	0.734556
	3.16667	0.884987		50.1667	0.287132		8.93	0.387808		58.1667	0.465734		43.1667	0.727542
	3.33333	0.887325		50.3333	0.282881		9.09667	0.379226		58.3333	0.473528		43.3333	0.725204
	3.5	0.884987		50.5	0.280756		9.26333	0.373381		58.5	0.469631		43.5	0.727542
	3.66667	0.887325		50.6667	0.27863		9.43	0.378066		58.6667	0.465734		43.6667	0.725204
	3.83333	0.884987		50.8333	0.27863		9.59667	0.388968		58.8333	0.469631		43.8333	0.72988
	4	0.889664		51	0.27863		9.76333	0.388968		59	0.467682		44	0.734556
	4.16667	0.887325		51.1667	0.272254		9.93	0.388968		59.1667	0.469631		44.1667	0.751571
	4.33333	0.887325		51.3333	0.280756		10.0967	0.38702		59.3333	0.473528		44.3333	0.736894
	4.5	0.884987		51.5	0.270128		10.2633	0.390917		59.5	0.477425		44.5	0.734556
	4.66667	0.868621		51.6667	0.280756		10.43	0.39871		59.6667	0.481321		44.6667	0.736894
	4.83333	0.884987		51.8367	0.282881		10.5967	0.397551		59.8333	0.475476		44.8333	0.765599
	5	0.884987		52	0.268002		10.7633	0.403396		60	0.469631		45	0.763261
	5.16667	0.889664		52.1667	0.268002		10.93	0.393654		60.1667	0.475476		45.1667	0.736894
	5.33333	0.887325		52.3333	0.268002		11.0967	0.392865		60.3333	0.475476		45.3333	0.744556
	5.5	0.887325		52.5	0.268002		11.2633	0.404556		60.5	0.477425		45.5	0.742218
	5.66667	0.884987		52.6667	0.27863		11.43	0.403396		60.6667	0.473528		45.6667	0.746894
	5.83333	0.892002		52.8333	0.272254		11.5967	0.405344		60.8333	0.475476		45.8333	0.737542
	6	0.889664		53	0.268002		11.7633	0.404556		61	0.475476		46	0.741571
	6.16667	0.903692		53.1667	0.261626		11.93	0.406504		61.1667	0.475476		46.1667	0.741571
	6.33333	0.90603		53.3333	0.270128		12.0967	0.406504		61.3333	0.459889		46.3333	0.741571
	6.5	0.884987		53.5	0.268002		12.2633	0.404556		61.5	0.473528		46.5	0.746894
	6.66667	0.90603		53.6667	0.263751		12.43	0.413138		61.6667	0.469631		46.6667	0.742218
	6.83333	0.899016		53.8333	0.2595		12.5967	0.410401		61.8333	0.469631		46.8333	0.741571
	7	0.903692		54	0.265877		12.7633	0.415086		62	0.465734		47	0.749233
	7.16667	0.903692		54.1667	0.261626		12.93	0.418983		62.1667	0.475476		47.1667	0.753261
	7.33333	0.90603		54.3333	0.255249		13.0967	0.436519		62.3333	0.475476		47.3333	0.746894
	7.5	0.913045		54.5	0.253124		13.2633	0.418195		62.5	0.473528		47.5	0.743909
	7.66667	0.922397		54.67	0.263751		13.43	0.420143		62.67	0.475476		47.6667	0.744556
	7.83333	0.908368		54.8333	0.253124		13.5967	0.420143		62.8333	0.475476		47.8333	0.751571
	8	0.908368		55	0.253124		13.7633	0.422091		63	0.475476		48	0.746894
	8.16667	0.887325		55.1667	0.261626		13.93	0.43457		63.1667	0.475476		48.1667	0.742218
	8.33333	0.90603		55.3333	0.248873		14.0967	0.429885		63.3333	0.475476		48.3333	0.771966
	8.5	0.908368		55.5	0.248873		14.2633	0.429885		63.5	0.477425		48.5	0.746247
	8.66667	0.913045		55.6667	0.244621		14.43	0.433782		63.6667	0.48327		48.6667	0.742218
	8.83333	0.922397		55.8367	0.253124		14.5967	0.433782		63.8333	0.479373		48.8333	0.749233
	9	0.922397		56	0.246747		14.7633	0.433782		64	0.481321		49	0.746894
	9.16667	0.924735		56.17	0.248873		14.93	0.43573		64.1667	0.485218		49.1667	0.749233
	9.33333	0.924735		56.3333	0.238245		15.0967	0.437679		64.3333	0.489115		49.3333	0.748585
	9.5	0.922397		56.5	0.268002		15.2633	0.441576		64.5	0.479373		49.5	0.748585
	9.66667	0.927073		56.6667	0.250998		15.43	0.437679		64.6667	0.48327		49.6667	0.749233
	9.83333	0.922397		56.8367	0.253124		15.5967	0.439627		64.8333	0.481321		49.8333	0.746894
	10	0.924735		57	0.238245		15.7633	0.447421		65	0.481321		50	0.749233
	10.1667	0.927073		57.1667	0.244621		15.93	0.454054		65.1667	0.479373		50.1667	0.751571
	10.3333	0.922397		57.3333	0.250998		16.0967	0.447421		65.3333	0.481321		50.3333	0.758585
	10.5	0.941102		57.5	0.242496		16.2633	0.447421		65.5	0.48327		50.5	0.767937
	10.6667	0.929411		57.6667	0.246747		16.43	0.449369		65.6667	0.48327		50.6667	0.758585
	10.8333	0.924735		57.8367	0.244621		16.5967	0.451317		65.8333	0.479373		50.8333	0.756247
	11	0.94344		58	0.242496		16.7633	0.466905		66	0.479373		51	0.765599
	11.1667	0.94344		58.1667	0.246747		16.93	0.457163		66.1667	0.477425		51.1667	0.758585
	11.3333	0.924735		58.3333	0.248873		17.0967	0.455214		66.3333	0.477425		51.3333	0.758585
	11.5	0.94344		58.5	0.233994		17.2633	0.455214		66.5	0.48327		51.5	0.765599
	11.6667	0.931749		58.6667	0.238245		17.43	0.457163		66.6667	0.479373		51.6667	0.767937
	11.8333	0.94344		58.8333	0.238245		17.5967	0.46106		66.8333	0.481321		51.8333	0.758585
	12	0.924735		59	0.231868		17.7633	0.455214		67	0.485218		52	0.774952
	12.1667	0.94344		59.1667	0.233994		17.93	0.463008		67.1667	0.481321		52.1667	0.767937
	12.3333	0.94344		59.3333	0.236119		18.0967	0.469642		67.3333	0.481321		52.3333	0.763261
	12.5	0.94344		59.5	0.22124		18.2633	0.470802		67.5	0.485218		52.5	0.758585
	12.6667	0.94344		59.6667	0.229743		18.43	0.468853		67.6667	0.489115		52.6667	0.763261
	12.8333	0.945778		59.8367	0.214864		18.5967	0.470802		67.8333	0.48327		52.8333	0.765599
	13	0.94344		60	0.229743		18.7633	0.470802		68	0.479373		53	0.770275
	13.1667	0.94344		60.1667	0.219115		18.93	0.47275		68.1667	0.48327		53.1667	0.763261
	13.3333	0.94344		60.3333	0.22124		19.0967	0.484441		68.3333	0.48327		53.3333	0.760923
	13.5	0.941102		60.5	0.216989		19.2633	0.476647		68.5	0.485218		53.5	0.760923
	13.6667	0.94344		60.6667	0.216989		19.43	0.480544		68.6667	0.48327		53.6667	0.765599
	13.8333	0.941102		60.8333	0.225492		19.5967	0.486389		68.8333	0.479373		53.8333	0.760923
	14	0.962145		61	0.210613		19.7633	0.480544		69	0.48327		54	0.760923
	14.1667	0.962145		61.1667	0.212738		19.93	0.490286		69.1667	0.493012		54.1667	0.760923
	14.3333	0.962145		61.3333	0.22124		20.0967	0.487177		69.3333	0.491063		54.3333	0.77729
	14.5	0.948116		61.5	0.212738		20.2633	0.486389		69.5	0.489115		54.5	0.760923
	14.6667	0.94344		61.6667	0.219115		20.43	0.482492		69.6667	0.475476		54.6667	0.770275
	14.8333	0.959807		61.8333	0.197859		20.5967	0.484441		69.8333	0.487167		54.8333	0.760923
	15	0.959807		62	0.212738		20.7633	0.486389		70	0.48327		55	0.760923
	15.1667	0.962145		62.1667	0.210613		20.93	0.486389		70.1667	0.485218		55.1667	0.765599
	15.3333	0.964483		62.3333	0.197859		21.0967	0.517564		70.3333	0.481321		55.3333	0.784304
	15.5	0.957468		62.5	0.197859		21.2633	0.494182		70.5	0.485218		55.5	0.760923
	15.6667	0.962145		62.6667	0.197859		21.43	0.492235		70.6667	0.489115		55.6667	0.765599
	15.8333	0.973835		62.8367	0.204236		21.5967	0.496131		70.8333	0.481321		55.8333	0.758585
	16	0.959807		63	0.193608		21.7633	0.496131		71	0.485218		56	0.763261
	16.1667	0.945778		63.1667	0.193608		21.93	0.501977		71.1667	0.48327		56.1667	0.763261
	16.3333	0.962145		63.3333	0.210613		22.0967	0.500028		71.3333	0.479373		56.3333	0.765599
	16.5	0.962145		63.5	0.193608		22.2633	0.500028		71.5	0.479373		56.5	0.767937
	16.6667	0.959807		63.6667	0.199985		22.43	0.507822		71.6667	0.491063		56.6667	0.770275
	16.8333	0.945778		63.8333	0.202111		22.5967	0.501977		71.8333	0.489115		56.8333	0.77729
	17	0.962145		64	0.193608		22.7633	0.505874		72	0.48327		57	0.774952
	17.1667	0.980849		64.1667	0.191483		22.93	0.523409		72.1667	0.489115		57.1667	0.770275
	17.3333	0.962145		64.3333	0.208487		23.0967	0.519512		72.3333	0.481321		57.3333	0.770275
	17.5	0.964483		64.5	0.195734		23.2633	0.513667		72.5	0.481321		57.5	0.770275
	17.6667	0.976173		64.6667	0.202111		23.43	0.515615		72.6667	0.481321		57.6667	0.781966
	17.8333	0.962145		64.8333	0.195734		23.5967	0.519512		72.8333	0.479373		57.8333	0.774952
	18	0.980849		65	0.193608		23.7633	0.525357		73	0.479373		58	0.767937
	18.1667	0.980849		65.1667	0.193608		23.93	0.525357		73.1667	0.477425		58.1667	0.779628
	18.3333	0.96513		65.3333	0.187232		24.0967	0.525357		73.3333	0.475476		58.3333	0.767937
	18.5	0.980849		65.5	0.193608		24.2633	0.525357		73.5	0.477425		58.5	0.77729
	18.6667	0.980849		65.6667	0.191483		24.43	0.525357		73.6667	0.463786		58.6667	0.765599
	18.8333	0.980849		65.8333	0.185106		24.5967	0.529254		73.8333	0.479373		58.8333	0.763261
	19	0.980849		66	0.193608		24.7633	0.527306		74	0.475476		59	0.763261
	19.1667	0.980849		66.1667	0.178729		24.93	0.529254		74.1667	0.48327		59.1667	0.765599
	19.3333	0.983188		66.3333	0.178729		25.0967	0.527306		74.3333	0.479373		59.3333	0.765599
	19.5	0.980849		66.5	0.180855		25.2633	0.529254		74.5	0.489115		59.5	0.767937
	19.6667	0.978511		66.6667	0.189357		25.43	0.538996		74.6667	0.479373		59.6667	0.765599
	19.8333	0.980849		66.8333	0.178729		25.5967	0.527306		74.8333	0.481321		59.8333	0.781966
	20	0.983188		67	0.176604		25.7633	0.533151		75	0.486256		60	0.765599
	20.1667	0.980849		67.1667	0.180855		25.93	0.533151		75.1667	0.489115		60.1667	0.765599
	20.3333	0.978511		67.3333	0.176604		26.0967	0.533151		75.3333	0.486256		60.3333	0.779628
	20.5	0.980849		67.5	0.180855		26.2633	0.5351		75.5	0.48327		60.5	0.774952
	20.6667	0.980849		67.6667	0.185106		26.43	0.538996		75.6667	0.48327		60.6667	0.765599
	20.8333	0.980849		67.8367	0.178729		26.5967	0.542893		75.8333	0.482359		60.8333	0.765599
	21	0.978511		68	0.165976		26.7633	0.548739		76	0.482359		61	0.767937
	21.1667	0.980849		68.1667	0.174478		26.93	0.54679		76.1667	0.48327		61.1667	0.767937
	21.3333	0.980849		68.3333	0.189357		27.0967	0.542893		76.3333	0.485218		61.3333	0.774952
	21.5	0.980849		68.5	0.165976		27.2633	0.54679		76.5	0.491063		61.5	0.767937
	21.6667	0.980849		68.6667	0.168102		27.43	0.548739		76.6667	0.48327		61.6667	0.765599
	21.8333	0.978511		68.8333	0.172353		27.5967	0.548739		76.8333	0.484307		61.8333	0.767937
	22	0.978511		69	0.176604		27.7633	0.556532		77	0.481321		62	0.763261
	22.1667	0.980849		69.1667	0.176604		27.93	0.55848		77.1667	0.482359		62.1667	0.770275
	22.3333	0.962145		69.3333	0.176604		28.0967	0.544842		77.3333	0.473528		62.3333	0.770275
	22.5	0.978511		69.5	0.170227		28.2633	0.556532		77.5	0.48041		62.5	0.765599
	22.6667	0.980849		69.6667	0.176604		28.43	0.54679		77.6667	0.478462		62.6667	0.784304
	22.8333	0.983188		69.8367	0.168102		28.5967	0.540944		77.8333	0.479373		62.8333	0.770275
	23	0.980849		70	0.174478		28.7633	0.550687		78	0.48041		63	0.774952
	23.1667	0.985526		70.1667	0.161725		28.93	0.554583		78.1667	0.479373		63.1667	0.774952
	23.3333	0.978511		70.3333	0.165976		29.0967	0.560429		78.3333	0.478462		63.3333	0.767937
	23.5	0.980849		70.5	0.170227		29.2633	0.554583		78.5	0.475476		63.5	0.767937
	23.6667	0.978511		70.6667	0.165976		29.43	0.554583		78.6667	0.48041		63.6667	0.798333
	23.8333	0.980849		70.8367	0.163851		29.5967	0.556532		78.8333	0.476513		63.8333	0.767937
	24	0.980849		71	0.1596		29.7633	0.554583		79	0.476513		64	0.77729
	24.1667	0.978511		71.1667	0.165976		29.93	0.564326		79.1667	0.474565		64.1667	0.767937
	24.3333	0.980849		71.3367	0.163851		30.0967	0.560429		79.3333	0.472617		64.3333	0.767937
	24.5	0.978511		71.5	0.163851		30.2633	0.55848		79.5	0.465734		64.5	0.779628
	24.6667	0.980849		71.6667	0.165976		30.43	0.55848		79.6667	0.46872		64.6667	0.767937
	24.8333	0.978511		71.8367	0.161725		30.5967	0.556532		79.8333	0.470668		64.8333	0.781966
	25	0.985526		72	0.1596		30.7633	0.564326		80	0.467682		65	0.765599
	25.1667	0.999554		72.1667	0.165976		30.93	0.577965		80.1667	0.467682		65.1667	0.770275
	25.3333	0.997216		72.3333	0.161725		31.0967	0.564326		80.3333	0.46872		65.3333	0.767937
	25.5	0.999554		72.5	0.1596		31.2633	0.570171		80.5	0.46872		65.5	0.763261
	25.6667	0.983188		72.6667	0.161725		31.43	0.55848		80.6667	0.466771		65.6667	0.765599
	25.8333	0.997216		72.8333	0.163851		31.5967	0.576016		80.8333	0.470668		65.8333	0.765599
	26	0.980849		73	0.161725		31.7633	0.576016		81	0.466771		66	0.774952
	26.1667	0.999554		73.1667	0.144721		31.93	0.576016		81.1667	0.465734		66.1667	0.767937
	26.3333	0.980849		73.3333	0.146846		32.0967	0.587707		81.3333	0.46872		66.3333	0.78898
	26.5	0.978511		73.5	0.1596		32.2633	0.574068		81.5	0.466771		66.5	0.765599
	26.6667	0.999554		73.67	0.148972		32.43	0.574068		81.6667	0.470668		66.6667	0.765599
	26.8333	0.997216		73.8333	0.151097		32.5967	0.576016		81.8333	0.46872		66.8333	0.767937
	27	0.997216		74	0.151097		32.7633	0.576016		82	0.470668		67	0.767937
	27.1667	0.999554		74.1667	0.151097		32.93	0.587707		82.1667	0.466771		67.1667	0.774952
	27.3333	0.999554		74.3333	0.161725		33.0967	0.587707		82.3333	0.463786		67.3333	0.763261
	27.5	0.994878		74.5	0.148972		33.2633	0.589655		82.5	0.466771		67.5	0.770275
	27.6667	0.997216		74.6667	0.161725		33.43	0.589655		82.6667	0.45794		67.6667	0.77729
	27.8333	0.999554		74.8367	0.148972		33.5967	0.591604		82.8333	0.460926		67.8333	0.770275
	28	0.999554		75	0.148972		33.7633	0.591604		83	0.460926		68	0.779628
	28.1667	0.999554		75.1667	0.151097		33.93	0.597449		83.1667	0.466771		68.1667	0.77729
	28.3333	0.997216		75.3333	0.144721		34.0967	0.595501		83.3333	0.46872		68.3333	0.770275
	28.5	1.00657		75.5	0.144721		34.2633	0.601345		83.5	0.464823		68.5	0.779628
	28.6667	0.980849		75.6667	0.144721		34.43	0.607191		83.6667	0.46872		68.6667	0.779628
	28.8333	0.997216		75.8333	0.142595		34.5967	0.605243		83.8333	0.462875		68.8333	0.770275
	29	1.00657		76	0.142595		34.7633	0.607191		84	0.457029		69	0.77729
	29.1667	0.999554		76.1667	0.148972		34.93	0.607191		84.1667	0.462875		69.1667	0.786642
	29.3333	0.999554		76.3333	0.142595		35.0967	0.611088		84.3333	0.460926		69.3333	0.795995
	29.5	0.997216		76.5	0.14047		35.2633	0.613037		84.5	0.457029		69.5	0.774952
	29.6667	0.980849		76.6667	0.136219		35.43	0.618881		84.6667	0.457029		69.6667	0.774952
	29.8333	1.01592		76.8333	0.136219		35.5967	0.62083		84.8333	0.462875		69.8333	0.770275
	30	1.01826		77	0.131967		35.7633	0.62083		85	0.462875		70	0.767937
	30.1667	1.00189		77.1667	0.12134		35.93	0.62083		85.1667	0.460926		70.1667	0.770275
	30.3333	1.01826		77.3333	0.14047		36.0967	0.613037		85.3333	0.457029		70.3333	0.770275
	30.5	0.999554		77.5	0.146846		36.2633	0.624727		85.5	0.455081		70.5	0.767937
	30.6667	1.00657		77.6667	0.131967		36.43	0.622778		85.6667	0.460926		70.6667	0.767937
	30.8333	0.999554		77.8333	0.134093		36.5967	0.626676		85.8333	0.466771		70.8333	0.781966
	31	1.01826		78	0.131967		36.7633	0.628624		86	0.462875		71	0.77729
	31.1667	1.01826		78.1667	0.134093		36.93	0.626676		86.1667	0.455081		71.1667	0.779628
	31.3333	1.00891		78.3333	0.131967		37.0967	0.624727		86.3333	0.462875		71.3333	0.770275
	31.5	1.01826		78.5	0.134093		37.2633	0.626676		86.5	0.457029		71.5	0.770275
	31.6667	1.01592		78.6667	0.136219		37.43	0.622778		86.6667	0.466771		71.6667	0.781966
	31.8333	1.01826		78.8367	0.136219		37.5967	0.626676		86.8333	0.466771		71.8333	0.78898
	32	1.01592		79	0.131967		37.7633	0.611088		87	0.464823		72	0.781966
	32.1667	1.01826		79.1667	0.131967		37.93	0.624727		87.1667	0.482359		72.1667	0.786642
	32.3333	1.0206		79.3333	0.136219		38.0967	0.622778		87.3333	0.46872		72.3333	0.784304
	32.5	1.01826		79.5	0.146846		38.2633	0.624727		87.5	0.476513		72.5	0.78898
	32.6667	1.01826		79.6667	0.127716		38.43	0.62083		87.6667	0.464823		72.6667	0.795995
	32.8333	1.01826		79.8333	0.142595		38.5967	0.622778		87.8333	0.46872		72.8333	0.78898
	33	1.01592		80	0.129842		38.7633	0.626676		88	0.462875		73	0.793656
	33.1667	1.01826		80.1667	0.125591		38.93	0.618881		88.1667	0.462875		73.1667	0.786642
	33.3333	1.01592		80.3333	0.119214		39.0967	0.62083		88.3333	0.464823		73.3333	0.78898
	33.5	1.01826		80.5	0.129842		39.2633	0.616933		88.5	0.462875		73.5	0.78898
	33.6667	1.03696		80.6667	0.125591		39.43	0.62083		88.6667	0.462875		73.6667	0.795995
	33.8333	1.01826		80.8333	0.129842		39.5967	0.618881		88.8333	0.462875		73.8333	0.795995
	34	1.01826		81	0.129842		39.7633	0.60914		89	0.466771		74	0.803009
	34.1667	1.0206		81.1667	0.125591		39.93	0.613037		89.1667	0.46872		74.1667	0.798333
	34.3333	1.0206		81.3333	0.125591		40.0967	0.60914		89.3333	0.46872		74.3333	0.798333
	34.5	1.01592		81.5	0.123465		40.2633	0.613037		89.5	0.470668		74.5	0.786642
	34.6667	1.01826		81.6667	0.125591		40.43	0.607191		89.6667	0.46872		74.6667	0.786642
	34.8367	1.01826		81.8333	0.125591		40.5967	0.603294		89.8333	0.472617		74.8333	0.786642
	35	1.01826		82	0.119214		40.7633	0.611088		90	0.466771		75	0.781966
	35.1667	1.00657		82.1667	0.125591		40.93	0.607191		90.1667	0.478462		75.1667	0.77729
	35.3333	1.01826		82.3333	0.123465		41.0967	0.616933		90.3333	0.46872		75.3333	0.779628
	35.5	1.01358		82.5	0.131967		41.2633	0.607191		90.5	0.472617		75.5	0.779628
	35.6667	1.01826		82.6667	0.127716		41.43	0.613037		90.6667	0.470668		75.6667	0.779628
	35.8333	0.999554		82.8333	0.125591		41.5967	0.62083		90.8333	0.466771		75.8333	0.779628
	36	1.01592		83	0.114963		41.7633	0.62083		91	0.472617		76	0.779628
	36.1667	1.01826		83.1667	0.119214		41.93	0.618881		91.1667	0.46872		76.1667	0.779628
	36.3333	1.01592		83.3333	0.119214		42.0967	0.63252		91.3333	0.46872		76.3333	0.781966
	36.5	1.01592		83.5	0.117089		42.2633	0.624727		91.5	0.46872		76.5	0.781966
	36.6667	1.01826		83.6667	0.119214		42.43	0.628624		91.6667	0.466771		76.6667	0.779628
	36.8333	1.01826		83.8367	0.119214		42.5967	0.634469		91.8333	0.462875		76.8333	0.784304
	37	1.01592		84	0.114963		42.7633	0.634469		92	0.464823		77	0.78898
	37.1667	1.01826		84.1667	0.112838		42.93	0.636417		92.1667	0.464823		77.1667	0.78898
	37.3333	1.01826		84.3333	0.110712		43.0967	0.636417		92.34	0.462875		77.3333	0.781966
	37.5	1.01826		84.5	0.110712		43.2633	0.63252		92.5	0.460926		77.5	0.781966
	37.6667	1.01826		84.6667	0.117089		43.43	0.642263		92.6667	0.462875		77.6667	0.781966
	37.8333	1.01826		84.8367	0.112838		43.5967	0.640314		92.8333	0.462875		77.8333	0.781966
	38	0.999554		85	0.114963		43.7633	0.638366		93	0.464823		78	0.781966
	38.1667	1.0206		85.1667	0.114963		43.93	0.638366		93.1667	0.455081		78.1667	0.786642
	38.3333	1.0206		85.3333	0.112838		44.0967	0.642263		93.3333	0.457029		78.3333	0.781966
	38.5	1.01826		85.5	0.113698		44.2633	0.640314		93.5	0.462875		78.5	0.784304
	38.6667	1.0206		85.6667	0.112838		44.43	0.652005		93.6667	0.460926		78.6667	0.781966
	38.8333	1.01592		85.8333	0.111572		44.5967	0.642263		93.8333	0.464823		78.8333	0.784304
	39	1.01826		86	0.110712		44.7633	0.640314		94	0.462875		79	0.798333
	39.1667	1.01826		86.1667	0.108586		44.93	0.648108		94.1667	0.462875		79.1667	0.77729
	39.3333	1.01826		86.3333	0.111572		45.0967	0.648108		94.3333	0.466771		79.3333	0.784304
	39.5	1.0206		86.5	0.113698		45.2633	0.638366		94.5	0.470668		79.5	0.781966
	39.6667	1.01592		86.6667	0.113698		45.43	0.650056		94.6667	0.462875		79.6667	0.786642
	39.8333	1.01592		86.8333	0.0945679		45.6	0.650056		94.8333	0.462875		79.8333	0.784304
	40	1.0206		87	0.105196		45.7633	0.650056		95	0.464823		80	0.786642
	40.1667	1.01826		87.1667	0.115823		45.93	0.650056		95.1667	0.466771		80.1667	0.78898
	40.3333	1.01826		87.3333	0.111572		46.0967	0.650056		95.3333	0.470668		80.3333	0.798333
	40.5	1.01826		87.5	0.105196		46.2633	0.650056		95.5	0.46872		80.5	0.795995
	40.6667	1.01826		87.6667	0.105196		46.43	0.667592		95.6667	0.466771		80.6667	0.798333
	40.8333	1.01826		87.84	0.10307		46.5967	0.650056		95.8333	0.474565		80.8333	0.795995
	41	1.01826		88	0.105196		46.7633	0.653953		96	0.476513		81	0.803009
	41.1667	1.01592		88.1667	0.111572		46.93	0.648108		96.1667	0.478462		81.1667	0.795995
	41.3333	1.02294		88.3333	0.098819		47.0967	0.650056		96.3333	0.482359		81.3333	0.795995
	41.5	1.01826		88.5	0.0966934		47.2633	0.638366		96.5	0.472617		81.5	0.793656
	41.6667	1.01826		88.6667	0.100945		47.43	0.640314		96.6667	0.48041		81.6667	0.798333
	41.8333	1.01826		88.8367	0.100945		47.5967	0.652005		96.8333	0.482359		81.8333	0.798333
	42	1.01826		89	0.098819		47.7633	0.650056		97	0.478462		82.0033	0.798333
	42.1667	1.01826		89.1667	0.098819		47.93	0.638366		97.1667	0.484307		82.1667	0.803009
	42.3333	1.01826		89.3333	0.098819		48.0967	0.638366		97.3333	0.478462		82.3333	0.800671
	42.5	1.01826		89.5	0.10307		48.2633	0.642263		97.5	0.48041		82.5	0.805347
	42.6667	1.01826		89.6667	0.0966934		48.43	0.640314		97.6667	0.484307		82.6667	0.800671
	42.8333	1.01358		89.8333	0.10307		48.5967	0.650056		97.8333	0.484307		82.8333	0.805347
	43	1.01592		90	0.100945		48.7633	0.644211		98	0.48041		83	0.805347
	43.1667	1.01826		90.1667	0.0945679		48.93	0.667592		98.1667	0.488204		83.1667	0.807685
	43.3333	1.01826		90.3333	0.0966934		49.0967	0.650056		98.3333	0.484307		83.3333	0.807685
	43.5	1.01826		90.5	0.100945		49.2633	0.642263		98.5	0.494049		83.5	0.814699
	43.6667	1.01826		90.6667	0.0860657		49.43	0.653953		98.6667	0.488204		83.6667	0.810023
	43.8333	1.01592		90.8367	0.0881912		49.5967	0.663695		98.8333	0.486256		83.8333	0.803009
	44	1.03229		91	0.0839401		49.7633	0.652005		99	0.488204		84	0.817037
	44.1667	1.02527		91.1667	0.0945679		49.93	0.652005		99.1667	0.488204		84.1667	0.814699
	44.3333	1.01592		91.3333	0.0903168		50.0967	0.650056		99.3367	0.482359		84.3333	0.814699
	44.5	1.01826		91.5	0.0924423		50.2633	0.644211		99.5	0.494049		84.5	0.814699
	44.6667	1.01826		91.6667	0.0945679		50.43	0.644211		99.6667	0.492101		84.6667	0.817037
	44.8333	1.01826		91.8333	0.0945679		50.5967	0.650056		99.8333	0.494049		84.8333	0.814699
	45	1.03463		92	0.0945679		50.7633	0.655902		100	0.492101		85	0.814699
	45.1667	1.0206		92.1667	0.0860657		50.93	0.663695		100.167	0.488204		85.1667	0.819376
	45.3333	1.0206		92.3333	0.0818146		51.0967	0.663695		100.333	0.494049		85.3333	0.819376
	45.5	1.01826		92.5	0.0924423		51.2633	0.650056		100.5	0.497946		85.5	0.819376
	45.6667	1.03463		92.6667	0.0796891		51.43	0.653953		100.667	0.494049		85.6667	0.824052
	45.8333	1.0206		92.8367	0.0796891		51.5967	0.673438		100.833	0.494049		85.8333	0.819376
	46	1.0393		93	0.0860657		51.7633	0.655902		101	0.492101		86	0.821714
	46.1667	1.0206		93.1667	0.0881912		51.93	0.665643		101.167	0.488204		86.1667	0.819376
	46.3333	1.01826		93.3333	0.0796891		52.0967	0.665643		101.333	0.497946		86.3333	0.817037
	46.5	1.03696		93.5	0.0818146		52.2633	0.65785		101.5	0.494049		86.5	0.82639
	46.6667	1.03463		93.6667	0.0839401		52.43	0.653953		101.667	0.495998		86.6667	0.819376
	46.8333	1.03463		93.8367	0.0839401		52.5967	0.65785		101.837	0.497946		86.8333	0.817037
	47	1.02294		94	0.0796891		52.7633	0.655902		102	0.486256		87	0.83808
	47.1667	1.02995		94.1667	0.0796891		52.93	0.659798		102.167	0.499894		87.1667	0.819376
	47.3333	1.03463		94.3333	0.0775635		53.0967	0.669541		102.333	0.495998		87.3367	0.819376
	47.5	1.0393		94.5	0.0839401		53.2633	0.671489		102.5	0.495998		87.5033	0.814699
	47.6667	1.03696		94.6667	0.0796891		53.43	0.665643		102.667	0.492101		87.6667	0.819376
	47.8333	1.04398		94.8367	0.075438		53.5967	0.681231		102.833	0.497946		87.8333	0.821714
	48	1.01826		95	0.0775635		53.7633	0.665643		103	0.495998		88	0.82639
	48.1667	1.03463		95.1667	0.0775635		53.93	0.671489		103.167	0.497946		88.1667	0.82639
	48.3333	1.03463		95.3333	0.0796891		54.0967	0.673438		103.333	0.499894		88.3333	0.824052
	48.5	1.03696		95.5	0.0796891		54.2633	0.675385		103.5	0.499894		88.5	0.831066
	48.6667	1.04164		95.6667	0.0775635		54.43	0.683179		103.667	0.507688		88.6667	0.82639
	48.8333	1.03463		95.8367	0.0945679		54.5967	0.687076		103.833	0.507688		88.8333	0.828728
	49	1.03696		96	0.075438		54.7633	0.69487		104	0.507688		89	0.835742
	49.1667	1.0393		96.1667	0.0648102		54.93	0.700715		104.167	0.501843		89.1667	0.833404
	49.3333	1.04164		96.3333	0.0711869		55.0967	0.698767		104.333	0.501843		89.3333	0.833404
	49.5	1.0393		96.5	0.0669358		55.2633	0.696818		104.5	0.503791		89.5	0.840419
	49.6667	1.03696		96.6667	0.0669358		55.43	0.702664		104.667	0.499894		89.6667	0.845095
	49.8333	1.03463		96.8367	0.0796891		55.5967	0.698767		104.833	0.499894		89.8333	0.849771
	50	1.0393		97	0.0775635		55.7633	0.700715		105	0.503791		90	0.842757
	50.1667	1.04398		97.1667	0.0775635		55.93	0.702664		105.167	0.494049		90.1667	0.845095
	50.3333	1.02294		97.3333	0.0775635		56.0967	0.698767		105.333	0.501843		90.3333	0.852109
	50.5	1.03696		97.5	0.0690613		56.2633	0.700715		105.5	0.495998		90.5	0.845095
	50.6667	1.0393		97.6667	0.0775635		56.43	0.702664		105.667	0.497946		90.6667	0.845095
	50.8367	1.03696		97.8333	0.075438		56.5967	0.704612		105.833	0.494049		90.8333	0.854447
	51	1.03463		98	0.0669358		56.7633	0.700715		106	0.495998		91	0.852109
	51.1667	1.03696		98.1667	0.0690613		56.93	0.710457		106.167	0.497946		91.1667	0.852109
	51.3333	1.05333		98.3333	0.0669358		57.0967	0.710457		106.333	0.495998		91.3333	0.861461
	51.5	1.05567		98.5	0.0690613		57.2633	0.714354		106.5	0.495998		91.5	0.849771
	51.6667	1.03463		98.6667	0.0690613		57.43	0.710457		106.667	0.486256		91.6667	0.845095
	51.8333	1.04164		98.8333	0.0690613		57.5967	0.710457		106.833	0.494049		91.8333	0.852109
	52	1.0393		99	0.0669358		57.7633	0.710457		107	0.495998		92	0.854447
	52.1667	1.03696		99.1667	0.0626847		57.93	0.712406		107.167	0.497946		92.1667	0.854447
	52.3333	1.0393		99.3333	0.0669358		58.0967	0.712406		107.333	0.492101		92.3333	0.849771
	52.5	1.0393		99.5	0.0690613		58.2633	0.716303		107.5	0.492101		92.5	0.873152
	52.6667	1.0393		99.6667	0.075438		58.43	0.716303		107.667	0.488204		92.6667	0.856785
	52.8333	1.04398		99.8333	0.0690613		58.5967	0.716303		107.833	0.494049		92.8333	0.859123
	53	1.03696		100	0.0605591		58.7633	0.714354		108	0.484307		93	0.859123
	53.1667	1.03696		100.167	0.075438		58.93	0.718251		108.167	0.494049		93.1667	0.854447
	53.3333	1.05333		100.333	0.0690613		59.0967	0.718251		108.333	0.488204		93.3333	0.852109
	53.5	1.03696		100.5	0.0711869		59.2633	0.720199		108.5	0.492101		93.5	0.854447
	53.6667	1.03696		100.667	0.0796891		59.43	0.729941		108.667	0.499894		93.6667	0.861461
	53.8333	1.05333		100.833	0.0775635		59.5967	0.727993		108.833	0.488204		93.8333	0.856785
	54	1.05567		101	0.0690613		59.7633	0.720199		109	0.494049		94	0.852109
	54.1667	1.05333		101.167	0.0626847		59.93	0.720199		109.167	0.494049		94.1667	0.852109
	54.3333	1.05567		101.333	0.0669358		60.0967	0.720199		109.337	0.492101		94.3333	0.854447
	54.5	1.03696		101.5	0.0775635		60.2633	0.722147		109.5	0.488204		94.5	0.845095
	54.6667	1.05567		101.667	0.0626847		60.43	0.724096		109.667	0.492101		94.6667	0.845095
	54.8333	1.05567		101.837	0.0796891		60.5967	0.727993		109.833	0.488204		94.8333	0.852109
	55	1.05333		102	0.0669358		60.7633	0.727993		110	0.486256		95	0.861461
	55.1667	1.05567		102.167	0.0648102		60.93	0.726044		110.17	0.484307		95.1667	0.852109
	55.3333	1.05567		102.333	0.0796891		61.0967	0.726044		110.337	0.482359		95.3333	0.852109
	55.5	1.05567		102.5	0.052057		61.2633	0.729941		110.5	0.482359		95.5	0.859123
	55.6667	1.05801		102.667	0.0499314		61.43	0.73189		110.667	0.472617		95.6667	0.854447
	55.8333	1.05567		102.833	0.0584336		61.5967	0.733839		110.833	0.482359		95.8333	0.854447
	56	1.05567		103	0.0499314		61.7633	0.733839		111	0.486256		96.0033	0.852109
	56.1667	1.03696		103.167	0.0818146		61.93	0.73189		111.167	0.482359		96.1667	0.847433
	56.3333	1.05333		103.333	0.0669358		62.0967	0.733839		111.333	0.484307		96.3333	0.856785
	56.5	1.05333		103.5	0.0605591		62.2633	0.733839		111.5	0.484307		96.5	0.852109
	56.6667	1.05333		103.667	0.052057		62.43	0.74358		111.667	0.476513		96.6667	0.856785
	56.8333	1.05333		103.837	0.0584336		62.5967	0.73189		111.833	0.48041		96.8333	0.868476
	57	1.05567		104	0.0626847		62.7633	0.74358		112	0.482359		97.0033	0.859123
	57.1667	1.04865		104.167	0.056308		62.93	0.737735		112.167	0.48041		97.1667	0.861461
	57.3333	1.05567		104.333	0.0605591		63.0967	0.74358		112.333	0.482359		97.3333	0.866138
	57.5	1.05801		104.5	0.0414292		63.2633	0.751373		112.5	0.48041		97.5	0.870814
	57.6667	1.03696		104.667	0.0711869		63.43	0.749426		112.667	0.472617		97.6667	0.866138
	57.8333	1.05567		104.837	0.0626847		63.5967	0.74358		112.833	0.478462		97.8333	0.868476
	58	1.05567		105	0.0711869		63.7633	0.751373		113	0.478462		98	0.868476
	58.17	1.05333		105.167	0.0796891		63.93	0.749426		113.167	0.476513		98.1667	0.868476
	58.3333	1.05333		105.333	0.0529172		64.0967	0.751373		113.337	0.48041		98.3333	0.870814
	58.5	1.0393		105.5	0.0507916		64.2633	0.749426		113.5	0.478462		98.5	0.870814
	58.6667	1.05333		105.667	0.0499314		64.43	0.749426		113.667	0.48041		98.6667	0.870814
	58.8333	1.03696		105.833	0.0541825		64.5967	0.749426		113.833	0.482359		98.8333	0.87549
	59	1.03696		106	0.0669358		64.7633	0.751373		114	0.486256		99	0.877828
	59.1667	1.05567		106.167	0.0584336		64.93	0.753322		114.167	0.478462		99.1667	0.880166
	59.3333	1.03696		106.333	0.0478059		65.1	0.749426		114.333	0.48041		99.3333	0.880166
	59.5	1.05333		106.5	0.0465405		65.2633	0.753322		114.5	0.484307		99.5	0.880166
	59.6667	1.05567		106.667	0.0499314		65.43	0.753322		114.667	0.482359		99.6667	0.889519
	59.8333	1.03696		106.833	0.0456803		65.5967	0.751373		114.833	0.482359		99.8333	0.887181
	60	1.03696		107	0.0584336		65.7633	0.757219		115	0.486256		100	0.887181
	60.1667	1.0393		107.167	0.0550427		65.93	0.759956		115.167	0.482359		100.167	0.887181
	60.3333	1.03696		107.333	0.0529172		66.0967	0.772806		115.333	0.484307		100.333	0.880166
	60.5	1.03696		107.5	0.0550427		66.2633	0.768909		115.5	0.492101		100.5	0.887181
	60.6667	1.0393		107.667	0.0478059		66.43	0.765013		115.667	0.484307		100.667	0.887181
	60.8333	1.03696		107.833	0.0486661		66.5967	0.766961		115.833	0.486256		100.833	0.880166
	61	1.03696		108	0.0507916		66.7633	0.769699		116	0.482359		101	0.894195
	61.1667	1.03463		108.167	0.0507916		66.93	0.768909		116.167	0.48041		101.167	0.887181
	61.3333	1.04398		108.333	0.0550427		67.0967	0.76775		116.337	0.484307		101.333	0.887181
	61.5	1.0393		108.5	0.0465405		67.2633	0.768909		116.5	0.482359		101.5	0.887181
	61.6667	1.03696		108.667	0.0486661		67.43	0.772806		116.667	0.484307		101.667	0.887181
	61.8333	1.03463		108.833	0.0465405		67.5967	0.775543		116.833	0.476513		101.833	0.891857
	62	1.03696		109	0.0507916		67.7633	0.776704		117	0.482359		102	0.889519
	62.1667	1.0206		109.167	0.0507916		67.93	0.772806		117.167	0.478462		102.167	0.891857
	62.3333	1.01826		109.337	0.0550427		68.0967	0.770858		117.333	0.478462		102.333	0.887181
	62.5	1.03463		109.5	0.0550427		68.2667	0.774755		117.5	0.476513		102.5	0.896533
	62.6667	1.03463		109.667	0.0529172		68.43	0.782548		117.667	0.482359		102.667	0.891857
	62.8333	1.0206		109.833	0.0507916		68.5967	0.776704		117.833	0.492101		102.833	0.887181
	63	1.01592		110	0.0507916		68.7633	0.774755		118	0.484307		103.003	0.891857
	63.1667	1.03696		110.167	0.0571683		68.93	0.774755		118.167	0.48041		103.167	0.896533
	63.3333	1.01826		110.333	0.0507916		69.0967	0.780601		118.333	0.472617		103.333	0.894195
	63.5	1.01826		110.5	0.044415		69.2633	0.780601		118.5	0.476513		103.5	0.889519
	63.6667	1.01826		110.667	0.0486661		69.43	0.793079		118.667	0.472617		103.667	0.894195
	63.8333	1.03463		110.837	0.0465405		69.5967	0.785286		118.833	0.472617		103.833	0.908223
	64	1.03463		111	0.0486661		69.7633	0.785286		119	0.470668		104	0.891857
	64.1667	1.01826		111.167	0.0507916		69.93	0.782548		119.167	0.472617		104.167	0.898871
	64.3333	1.01826		111.333	0.0529172		70.0967	0.795028		119.337	0.472617		104.333	0.898871
	64.5	1.02294		111.5	0.0507916		70.2633	0.785286		119.5	0.472617		104.5	0.898871
	64.6667	1.01592		111.667	0.0550427		70.43	0.783337		119.667	0.478462		104.667	0.894195
	64.8333	1.00423		111.833	0.0486661		70.5967	0.791131		119.833	0.48041		104.833	0.910562
	65	1.01826		112	0.0465405		70.7633	0.785286		120	0.478462		105.003	0.908223
	65.1667	1.01891		112.167	0.0401639		70.93	0.806718		120.167	0.476513		105.167	0.9129
	65.3333	1.01826		112.333	0.044415		71.0967	0.787233		120.333	0.470668		105.333	0.915238
	65.5033	1.01826		112.5	0.0380383		71.2633	0.793079		120.5	0.464823		105.5	0.908223
	65.6667	1.01592		112.667	0.0401639		71.43	0.792291		120.667	0.484307		105.667	0.9129
	65.8333	1.02358		112.837	0.044415		71.5967	0.795028		120.833	0.476513		105.833	0.910562
	66	1.01826		113	0.0401639		71.7633	0.796188		121	0.476513		106.003	0.910562
	66.1667	1.01826		113.167	0.044415		71.93	0.810615		121.167	0.46872		106.167	0.926928
	66.3333	1.01826		113.333	0.0529172		72.0967	0.798136		121.337	0.472617		106.333	0.915238
	66.5	1.01826		113.5	0.0401639		72.2633	0.800873		121.5	0.472617		106.5	0.908223
	66.6667	1.01592		113.667	0.0529172		72.43	0.800084		121.667	0.472617		106.667	0.92459
	66.8333	1.02358		113.837	0.044415		72.5967	0.798925		121.833	0.478462		106.833	0.929266
	67	1.00189		114	0.0380383		72.7633	0.800873		122	0.476513		107	0.915238
	67.1667	1.00423		114.167	0.044415		72.93	0.802821		122.167	0.472617		107.167	0.917576
	67.3333	1.01592		114.333	0.044415		73.0967	0.800873		122.333	0.476513		107.333	0.919914
	67.5	1.01124		114.5	0.0380383		73.2633	0.800873		122.5	0.476513		107.5	0.919914
	67.6667	1.00254		114.667	0.0422894		73.43	0.808666		122.667	0.472617		107.667	0.926928
	67.8333	1.00423		114.837	0.0380383		73.5967	0.793079		122.833	0.478462		107.833	0.92459
	68	1.01592		115	0.0401639		73.7633	0.796188		123	0.478462		108.007	0.917576
	68.1667	1.00423		115.167	0.0401639		73.93	0.798136		123.167	0.478462		108.167	0.917576
	68.3333	1.00254		115.333	0.0359128		74.0967	0.800873		123.333	0.476513		108.333	0.926928
	68.5	1.00189		115.5	0.0231595		74.2633	0.808666		123.5	0.472617		108.5	0.917576
	68.6667	0.983188		115.667	0.0401639		74.43	0.800873		123.667	0.476513		108.667	0.92459
	68.8333	0.999554		115.833	0.0380383		74.5967	0.802821		123.833	0.470668		108.833	0.917576
	69	0.997216		116	0.044415		74.7633	0.806718		124	0.470668		109	0.919914
	69.1667	1.0002		116.167	0.0380383		74.93	0.816461		124.167	0.478462		109.167	0.917576
	69.3333	0.997216		116.333	0.044415		75.1	0.798136		124.337	0.476513		109.333	0.915238
	69.5	0.999554		116.5	0.0401639		75.2633	0.812564		124.503	0.482359		109.5	0.917576
	69.6667	0.983835		116.667	0.0295362		75.43	0.812564		124.667	0.472617		109.667	0.926928
	69.8333	0.997216		116.833	0.0274106		75.5967	0.812564		124.833	0.478462		109.833	0.917576
	70	0.983835		117	0.0359128		75.7633	0.816461		125	0.476513		110.003	0.917576
	70.1667	0.988511		117.167	0.0359128		75.93	0.818408		125.167	0.48041		110.167	0.919914
	70.3333	0.997216		117.333	0.0316617		76.0967	0.821517		125.337	0.478462		110.333	0.915238
	70.5	1.0002		117.5	0.0295362		76.2633	0.824254		125.5	0.484307		110.5	0.917576
	70.6667	0.988511		117.667	0.0295362		76.4333	0.824254		125.667	0.46872		110.667	0.931604
	70.8333	0.988511		117.833	0.0337873		76.5967	0.822305		125.833	0.486256		110.833	0.9129
	71	1.0002		118	0.0380383		76.7667	0.816461		126	0.484307		111	0.910562
	71.1667	0.980849		118.167	0.0401639		76.93	0.830099		126.167	0.48041		111.167	0.92459
	71.3333	0.980849		118.333	0.0295362		77.0967	0.832047		126.337	0.478462		111.333	0.919914
	71.5	1.0002		118.5	0.0316617		77.2633	0.824254		126.5	0.482359		111.5	0.9129
	71.6667	0.973835		118.667	0.0359128		77.43	0.833996		126.667	0.482359		111.667	0.910562
	71.8333	0.979159		118.837	0.0337873		77.5967	0.815671		126.833	0.470668		111.833	0.9129
	72	1.0002		119	0.0274106		77.7633	0.826202		127	0.478462		112	0.9129
	72.1667	0.983835		119.167	0.0274106		77.93	0.824254		127.167	0.476513		112.167	0.910562
	72.3333	0.983835		119.333	0.0295362		78.0967	0.821517		127.333	0.478462		112.333	0.905885
	72.5	0.981497		119.5	0.0274106		78.2633	0.807878		127.5	0.482359		112.5	0.917576
	72.6667	0.983835		119.667	0.0231595		78.43	0.813723		127.667	0.472617		112.667	0.917576
	72.8367	0.983835		119.837	0.0295362		78.5967	0.832047		127.833	0.478462		112.833	0.917576
	73	0.983835		120	0.0295362		78.7667	0.815671		128	0.472617		113	0.9129
	73.1667	0.995526		120.167	0.0231595		78.93	0.824254		128.167	0.472617		113.167	0.908223
	73.3333	0.983835		120.333	0.0295362		79.0967	0.816461		128.337	0.472617		113.333	0.898871
	73.5	0.981497		120.5	0.021034		79.2633	0.824254		128.5	0.466771		113.5	0.910562
	73.6667	0.981497		120.667	0.0146573		79.4333	0.832047		128.667	0.46872		113.667	0.915238
	73.8333	0.986173		120.837	0.0167829		79.5967	0.824254		128.833	0.466771		113.833	0.908223
	74	0.986173		121	0.0295362		79.7633	0.821517		129	0.472617		114	0.905885
	74.1667	0.96513		121.167	0.0231595		79.9333	0.822305		129.167	0.466771		114.167	0.910562
	74.3333	0.983835		121.333	0.0189084		80.1	0.826202		129.333	0.476513		114.333	0.910562
	74.5	0.983835		121.5	0.0189084		80.2633	0.826202		129.5	0.470668		114.5	0.901209
	74.6667	0.981497		121.667	0.0167829		80.4333	0.833996		129.667	0.476513		114.667	0.901209
	74.8333	0.981497		121.833	0.0295362		80.6	0.826202		129.833	0.476513		114.833	0.905885
	75	0.981497		122	0.0125318		80.7633	0.818408		130	0.466771		115	0.896533
	75.1667	0.967469		122.167	0.021034		80.93	0.826202		130.167	0.470668		115.167	0.910562
	75.3333	0.981497		122.333	0.0125318		81.1	0.824254		130.333	0.470668		115.333	0.896533
	75.5	0.967469		122.5	0.0167829		81.2633	0.814512		130.5	0.46872		115.5	0.905885
	75.6667	0.962792		122.667	0.0167829		81.43	0.809827		130.667	0.46872		115.667	0.898871
	75.8333	0.972145		122.837	0.0146573		81.5967	0.818408		130.833	0.46872		115.833	0.919914
	75.8667	-0.567628		122.87	-0.0821634		81.7667	0.812564		130.853	-0.401043		115.86	-0.56651
	75.89	-0.965163		122.903	-0.13755		81.93	0.824254		130.873	-0.215165		115.887	-0.429542
	75.9067	-0.0538652		122.923	-0.122949		82.1	0.815671		130.89	-0.136884		115.917	-0.260892
	75.9233	-0.0844592		122.94	-0.0953443		82.2667	0.816461		130.907	-0.134086		115.95	-0.186492
	75.9433	0.000303953		122.957	-0.0709811		82.43	0.824254		130.923	-0.10659		115.99	-0.183419
	75.9633	-0.0932434		122.98	-0.00481734		82.5967	0.824254		130.94	-0.158853		116.023	-0.229337
	75.9833	-0.0376574		122.997	-0.0449309		82.7633	0.814512		130.96	-0.118376		116.04	-0.193214
	76	-0.0538277		123.013	-0.0661198		82.93	0.832047		130.977	-0.104519		116.06	-0.199241
	76.02	0.0247114		123.03	-0.0717195		83.0967	0.822305		130.993	-0.134186		116.077	-0.222283
	76.06	-0.0575407		123.047	-0.0606201		83.2667	0.818408		131.01	-0.115016		116.093	-0.213777
	76.0933	-0.0343701		123.067	-0.0648547		83.4333	0.818408		131.027	-0.131269		116.11	-0.207719
	76.1333	0.0466498		123.083	-0.0521348		83.5967	0.810615		131.05	-0.170497		116.137	-0.123856
	76.1567	-0.00952074		123.1	-0.0462466		83.7667	0.816461		131.067	-0.0850531		116.153	-0.205175
	76.1733	0.0121137		123.117	-0.0488606		83.93	0.819569		131.083	-0.147157		116.17	-0.188074
	76.19	0.000762221		123.133	-0.0238924		84.1	0.824254		131.1	-0.132488		116.193	-0.176045
	76.21	0.0234395		123.153	-0.0324779		84.2633	0.824254		131.127	-0.0740422		116.21	-0.199735
	76.2267	0.0289597		123.17	-0.0419236		84.4333	0.822305		131.15	-0.0999382		116.233	-0.180438
	76.2433	0.0196611		123.187	-0.0512195		84.6	0.814512		131.167	-0.0744178		116.25	-0.144523
	76.26	0.0560489		123.203	-0.0227661		84.7667	0.830099		131.183	-0.086883		116.267	-0.151011
	76.28	0.0696052		123.22	-0.0225608		84.9333	0.821517		131.2	0.0068935		116.283	-0.139793
	76.2967	0.0672671		123.24	-0.0289374		85.1	0.830099		131.217	-0.0525691		116.303	-0.13044
	76.3133	0.0645339		123.257	-0.0123881		85.2667	0.837104		131.233	-0.0633485		116.32	-0.121231
	76.33	0.0411529		123.273	-0.0272669		85.43	0.824254		131.267	-0.0575032		116.337	-0.115654
	76.3467	0.0458291		123.29	-0.0323782		85.6	0.828151		131.303	-0.0711422		116.353	-0.125007
	76.3667	0.0677722		123.31	-0.0149687		85.7667	0.828151		131.33	-0.0633485		116.37	-0.121373
	76.3833	0.080758		123.327	-0.0336935		85.9333	0.828151		131.36	-0.0730906		116.39	-0.121373
	76.4	0.0597151		123.343	-0.027722		86.0967	0.816461		131.38	-0.0760763		116.407	-0.142416
	76.4167	0.0690675		123.36	-0.0192198		86.2633	0.831259		131.397	-0.0491773		116.423	-0.126049
	76.4333	0.0550389		123.377	-0.0166392		86.43	0.824254		131.413	-0.0779975		116.44	-0.147092
	76.4533	0.0906482		123.397	-0.0888023		86.5967	0.826202		131.433	-0.453906		116.457	-0.121878
	76.47	0.0532385		123.413	-0.0046407		86.7667	0.832047		131.453	-0.460788		116.473	-0.12954
	76.4867	0.0485623		123.43	-0.0237706		86.93	0.830099		131.467	-0.429613		116.49	-0.12954
	76.5067	0.0555766		123.447	-0.0088918		87.0967	0.825414		131.483	-0.45884		116.507	-0.12954
	76.52	0.0298575		123.463	-0.0237706		87.2633	0.830099		131.5	-0.451046		116.523	-0.136554
	76.5367	0.0485623		123.48	-0.0237706		87.43	0.830099		131.517	-0.462737		116.54	-0.131878
	76.5533	0.0836339		123.497	-0.0280217		87.6	0.824254		131.537	-0.0711048		116.557	-0.120188
	76.57	0.0696052		123.513	-0.0258962		87.7633	0.825414		131.55	-0.0652595		116.573	-0.136554
	76.5867	0.0462242		123.53	-0.000389613		87.93	0.828151		131.567	-0.0594142		116.59	-0.145907
	76.6033	0.0579147		123.547	-0.0110173		88.0967	0.825414		131.583	-0.0691563		116.607	-0.12954
	76.62	0.0462242		123.563	-0.0480118		88.2667	0.825414		131.6	-0.0691563		116.623	-0.148245
	76.6367	0.0625909		123.58	-0.0203797		88.4333	0.813723		131.62	-0.0691563		116.64	-0.131878
	76.6533	0.0789577		123.6	-0.0280217		88.5967	0.814512		131.633	-0.0594142		116.657	-0.127202
	76.67	0.0766196		123.613	-0.0216451		88.7633	0.824254		131.65	-0.0496722		116.673	-0.138893
	76.6867	0.0742815		123.63	-0.0322728		88.93	0.814512		131.667	-0.0691563		116.69	-0.124864
	76.7033	0.0766196		123.647	-0.0216451		89.1	0.822305		131.683	-0.0496722		116.707	-0.124864
	76.72	0.0555766		123.663	-0.0301473		89.2633	0.821517		131.703	-0.0555174		116.723	-0.12954
	76.7367	0.0579147		123.68	-0.0258962		89.4333	0.825414		131.717	-0.0594142		116.74	-0.134216
	76.7533	0.0766196		123.697	-0.0450261		89.6	0.826202		131.733	-0.0574658		116.757	-0.155259
	76.77	0.0672671		123.713	-0.0429005		89.7633	0.830099		131.75	-0.0652595		116.773	-0.131878
	76.7867	0.0579147		123.73	-0.0195195		89.9333	0.823466		131.767	-0.0594142		116.79	-0.136554
	76.8033	0.0766196		123.747	-0.0343983		90.1	0.828151		131.787	-0.0516206		116.807	-0.127202
	76.82	0.0485623		123.763	-0.0301473		90.2633	0.827362		131.8	-0.0652595		116.823	-0.12954
	76.8367	0.0579147		123.783	-0.0152684		90.4333	0.833996		131.817	-0.0594142		116.84	-0.120188
	76.8533	0.0368718		123.797	-0.0301473		90.5967	0.832047		131.833	-0.0594142		116.857	-0.110835
	76.8733	0.0579147		123.817	-0.0280217		90.77	0.821517		131.85	-0.0847437		116.873	-0.134216
	76.89	0.0509004		123.833	-0.0322728		90.93	0.82931		131.87	-0.0652595		116.89	-0.115512
	76.9033	0.0111527		123.847	-0.0343983		91.0967	0.839053		131.883	-0.0691563		116.907	-0.115512
	76.92	0.0672671		123.867	-0.0280217		91.2667	0.833996		131.9	-0.053569		116.927	-0.110835
	76.9367	0.0672671		123.883	-0.0237706		91.2833	-0.0373586		131.917	-0.053569		116.943	-0.110835
	76.9533	0.0462242		123.9	-0.0343983		91.3	-0.043789		131.933	-0.053569		116.957	-0.134216
	76.97	0.0345337		123.913	-0.0216451		91.3167	-0.0479965		131.957	-0.0711048		116.973	-0.127202
	76.9867	0.0789577		123.93	-0.0216451		91.3333	-0.0497006		131.967	-0.0555174		116.993	-0.124864
	77.0033	0.0742815		123.947	-0.0280217		91.3533	0.0375258		131.983	-0.0691563		117.007	-0.150583
	77.02	0.0485623		123.963	-0.0152684		91.37	0.0858286		132	-0.0633111		117.023	-0.127202
	77.04	0.0228432		123.98	-0.00251516		91.3867	0.107271		132.017	-0.0613627		117.04	-0.12954
	77.0533	0.064929		123.997	-0.0237706		91.4033	0.137714		132.033	-0.0594142		117.057	-0.11785
	77.07	0.064929		124.013	-0.0152684		91.42	0.145517		132.05	-0.0652595		117.073	-0.131878
	77.09	0.0672671		124.03	-0.0203797		91.44	0.179113		132.067	-0.0711048		117.09	-0.124864
	77.1033	0.041548		124.047	-0.0152684		91.4567	0.181489		132.083	-0.0613627		117.107	-0.131878
	77.1233	0.0672671		124.063	-0.0288819		91.4733	0.221256		132.1	-0.0672079		117.123	-0.11785
	77.1367	0.0579147		124.08	-0.009752		91.49	0.249796		132.117	-0.0516206		117.14	-0.131878
	77.1533	0.0625909		124.097	-0.017394		91.5067	0.253331		132.133	-0.0750016		117.157	-0.143569
	77.17	0.0579147		124.113	-0.0216451		91.5267	0.272917		132.15	-0.0633111		117.173	-0.113173
	77.1867	0.041548		124.13	-0.0365239		91.5433	0.309204		132.167	-0.0496722		117.19	-0.127202
	77.2033	0.0555766		124.147	-0.009752		91.56	0.333104		132.183	-0.0652595		117.207	-0.136554
	77.22	0.0579147		124.163	-0.0258962		91.5767	0.36053		132.203	-0.053569		117.223	-0.131878
	77.2367	0.0579147		124.18	-0.009752		91.5933	0.346387		132.217	-0.0652595		117.24	-0.152921
	77.2533	0.0485623		124.197	-0.017394		91.61	0.37427		132.233	-0.0672079		117.257	-0.115512
	77.27	0.0485623		124.213	-0.0280217		91.6267	0.391806		132.253	-0.0574658		117.273	-0.138893
	77.2867	0.0462242		124.23	-0.0118776		91.6433	0.391806		132.267	-0.053569		117.29	-0.12954
	77.3033	0.04921		124.247	-0.040775		91.66	0.415187		132.29	-0.0691563		117.307	-0.138893
	77.32	0.072591		124.263	-0.0195195		91.6767	0.389486		132.3	-0.0691563		117.323	-0.110835
	77.3367	0.0672671		124.28	-0.0280217		91.6933	0.402337		132.32	-0.0750016		117.34	-0.134216
	77.3533	0.0796053		124.297	-0.0301473		91.71	0.388698		132.337	-0.0574658		117.357	-0.113173
	77.37	0.0655767		124.313	-0.0267564		91.74	0.378584		132.35	-0.0652595		117.373	-0.12954
	77.3867	0.0696052		124.33	-0.0480118		91.7733	0.381693		132.367	-0.0730532		117.39	-0.124864
	77.4033	0.0679148		124.347	-0.0267564		91.7933	0.383595		132.383	-0.0438269		117.407	-0.106159
	77.42	0.0602528		124.363	-0.0288819		91.81	0.40693		132.4	-0.0574658		117.423	-0.131878
	77.4367	0.0632386		124.38	-0.033133		91.8267	0.383549		132.417	-0.0652595		117.44	-0.115512
	77.4533	0.04921		124.397	-0.0352586		91.8433	0.387446		132.433	-0.0711048		117.457	-0.11785
	77.47	0.0462242		124.413	-0.0310075		91.86	0.385498		132.453	-0.0730532		117.473	-0.113173
	77.4867	0.0515481		124.43	-0.0267564		91.8767	0.385498		132.467	-0.053569		117.49	-0.131878
	77.5033	0.0485623		124.447	-0.0395096		91.8933	0.381601		132.483	-0.0574658		117.507	-0.136554
	77.52	0.0445338		124.463	-0.0310075		91.91	0.397188		132.5	-0.0691563		117.527	-0.134216
	77.5367	0.072591		124.48	-0.0280217		91.9267	0.377704		132.517	-0.0711048		117.54	-0.134216
	77.5533	0.0515481		124.497	-0.0237706		91.9433	0.397188		132.537	-0.0594142		117.557	-0.120188
	77.57	0.0609005		124.513	-0.0301473		91.96	0.379653		132.55	-0.0555174		117.573	-0.134216
	77.5867	0.0515481		124.53	-0.033133		91.9767	0.397188		132.567	-0.0652595		117.59	-0.131878
	77.6033	0.0305052		124.547	-0.0246308		91.9933	0.397188		132.583	-0.0516206		117.607	-0.136554
	77.62	0.0772672		124.563	-0.0288819		92.01	0.383549		132.6	-0.0555174		117.623	-0.136554
	77.6367	0.0562243		124.58	-0.0301473		92.0267	0.393292		132.62	-0.0652595		117.64	-0.131878
	77.6533	0.0889577		124.597	-0.0152684		92.0433	0.408879		132.633	-0.0574658		117.657	-0.115512
	77.67	0.0375195		124.613	-0.0225053		92.06	0.379653		132.65	-0.0594142		117.673	-0.134216
	77.6867	0.0749291		124.63	-0.0258962		92.0767	0.387446		132.667	-0.0866921		117.69	-0.138893
	77.7033	0.0632386		124.647	-0.0301473		92.0933	0.397188		132.683	-0.0633111		117.707	-0.124864
	77.72	0.0609005		124.663	-0.0258962		92.11	0.381601		132.703	-0.0574658		117.723	-0.12954
	77.7367	0.0398576		124.68	-0.0416352		92.1267	0.39524		132.717	-0.0594142		117.74	-0.120188
	77.7533	0.0328433		124.697	-0.0237706		92.1433	0.397188		132.733	-0.0652595		117.757	-0.138893
	77.77	0.0398576		124.713	-0.0246308		92.16	0.36991		132.75	-0.053569		117.777	-0.131878
	77.7867	0.0609005		124.73	-0.0161286		92.1767	0.393292		132.767	-0.0750016		117.79	-0.127202
	77.8033	0.0538862		124.747	-0.0352586		92.1933	0.36991		132.787	-0.0613627		117.81	-0.134216
	77.82	0.04921		124.763	-0.0280217		92.21	0.412776		132.8	-0.053569		117.823	-0.124864
	77.84	0.072591		124.783	-0.0237706		92.2267	0.379653		132.817	-0.053569		117.84	-0.115512
	77.8533	0.04921		124.797	-0.0480118		92.2433	0.381601		132.833	-0.0555174		117.857	-0.145907
	77.87	0.0538862		124.817	-0.033133		92.26	0.385498		132.85	-0.0652595		117.873	-0.11785
	77.8867	0.0772672		124.83	-0.0365239		92.2767	0.377704		132.87	-0.0788984		117.89	-0.12954
	77.9033	0.0609005		124.847	-0.0118776		92.2933	0.393292		132.883	-0.0750016		117.907	-0.120188
	77.92	0.0889577		124.867	-0.0288819		92.31	0.383549		132.9	-0.0730532		117.927	-0.143569
	77.9367	0.0702529		124.88	-0.0288819		92.3267	0.383549		132.917	-0.0652595		117.947	-0.11785
	77.9533	0.04921		124.897	-0.0343983		92.3433	0.36991		132.933	-0.0672079		117.96	-0.108497
	77.9733	0.0515481		124.913	-0.0182542		92.36	0.387446		132.95	-0.0672079		117.973	-0.11785
	77.9867	0.0702529		124.93	-0.0310075		92.3767	0.383549		132.967	-0.0574658		117.993	-0.127202
	78.0033	0.0796053		124.947	-0.0267564		92.3933	0.379653		132.983	-0.0555174		118.007	-0.110835
	78.02	0.0562243		124.963	-0.0267564		92.41	0.393292		133	-0.0594142		118.023	-0.113173
	78.0367	0.0398576		124.98	-0.0352586		92.4267	0.381601		133.017	-0.0633111		118.04	-0.110835
	78.0533	0.0515481		124.997	-0.033133		92.4433	0.367962		133.033	-0.0594142		118.057	-0.106159
	78.0733	0.0328433		125.013	-0.0182542		92.46	0.383549		133.05	-0.053569		118.073	-0.120188
	78.0933	0.0398576		125.03	-0.0267564		92.4767	0.383549		133.067	-0.0730532		118.09	-0.136554
	78.1067	0.04921		125.047	-0.0301473		92.4933	0.391343		133.083	-0.0652595		118.107	-0.136554
	78.1267	0.0538862		125.063	-0.033133		92.51	0.39524		133.1	-0.053569		118.123	-0.115512
	78.14	0.0445338		125.08	-0.0195195		92.5267	0.379653		133.12	-0.0730532		118.14	-0.113173
	78.1533	0.0515481		125.097	-0.0386494		92.5433	0.401085		133.133	-0.0691563		118.157	-0.136554
	78.17	0.0585624		125.113	-0.0246308		92.56	0.397188		133.15	-0.053569		118.173	-0.138893
	78.1867	0.0819434		125.13	-0.0267564		92.5767	0.364065		133.167	-0.0574658		118.193	-0.124864
	78.2033	0.0796053		125.147	-0.0131429		92.5933	0.377704		133.183	-0.0496722		118.207	-0.120188
	78.22	0.0702529		125.163	-0.0267564		92.61	0.387446		133.203	-0.0672079		118.223	-0.110835
	78.2367	0.0609005		125.18	-0.0131429		92.6267	0.393292		133.217	-0.0847437		118.24	-0.148245
	78.2533	0.04921		125.197	-0.0310075		92.6433	0.401085		133.233	-0.0711048		118.257	-0.127202
	78.27	0.0632386		125.213	-0.0280217		92.66	0.381601		133.253	-0.0788984		118.273	-0.134216
	78.2867	0.0796053		125.23	-0.033133		92.6767	0.401085		133.273	-0.0496722		118.29	-0.113173
							92.6933	0.39524
							92.7133	0.39524
							92.7267	0.39524
							92.7433	0.381601
							92.7633	0.381601
							92.7767	0.377704
							92.7933	0.410827
							92.81	0.393292
							92.8267	0.377704
							92.8433	0.379653
							92.86	0.387446
							92.8767	0.377704
							92.8933	0.367962
							92.91	0.39524
							92.9267	0.379653
							92.9433	0.385498
							92.96	0.364065
							92.9767	0.377704
							92.9933	0.383549
							93.01	0.385498
							93.0267	0.39524
							93.0433	0.393292
							93.06	0.393292
							93.0767	0.377704
							93.0933	0.381601
							93.11	0.379653
							93.1267	0.383549
							93.1433	0.381601
							93.16	0.393292
							93.1767	0.381601
							93.1933	0.39524
							93.21	0.377704
							93.2267	0.393292
							93.2433	0.381601
							93.26	0.385498
							93.2767	0.367962
							93.2933	0.385498
							93.31	0.397188
							93.3267	0.366014
							93.3433	0.387446
							93.36	0.397188
							93.3767	0.367962
							93.3933	0.377704
							93.41	0.381601
							93.4267	0.383549
							93.4433	0.39524
							93.46	0.379653
							93.4767	0.410827
							93.4933	0.39524
							93.51	0.379653
							93.5267	0.383549
							93.5433	0.377704
							93.56	0.401085
							93.5767	0.391343
							93.5933	0.383549
							93.61	0.393292
							93.6267	0.393292
							93.6433	0.383549
													-65
