# Supplementary material for: Characterization of convergent thickening, a major convergence force producing morphogenic movement in amphibians
Source: eLife. 2022 Apr 11;11:e57642. doi: 10.7554/eLife.57642 (PMC9064293; doi:10.7554/eLife.57642)
Supplement: Figure 5—figure supplement 3—source data 1. [file elife-57642-fig5-figsupp3-data1.xlsx]

## Sheet: Sheet1
Figure 5-supplementary figure 3F source data
			Movement rate (um/min; change in center of mass over 2.5 to 3 minute intervals)
			early	late
		mean	0.74321	0.614804
		SEM	0.0853438	0.0497584
		n	34	33
Figure 5-supplementary figure 3G source data
			Circularity (=4pi(area/perimeter^2); circle = 1)
			early	late
		mean	0.726	0.766154
		SEM	0.0212156	0.0139723
		n	40	39
Figure 5-supplementary figure 3H source data
			Length-width ratio (aspect ratio of major to minor axes)
			early	late
		L/W	1.722	1.60692
		SEM	0.128243	0.0690422
			40	39
Figure 5-supplementary figure 3I source data
			Perimeter length change
			early	late
		%/min	2.52276	2.22324
		SEM	0.401259	0.356428
		n	34	33
Figure 5-supplementary figure 3J source data
		Spreading of deep IMZ cells on Fc-Cadherin
			early (G-71 to -48m)	late (G-38 to 0m)
		% spread/min	0.646384	0.583966
		SEM	0.263322	0.131586
		n	7	7
		mid-point(min)	-59.5	-19.4286
			individual cell % area iincrease/min
			early	late
			0.893473	0.429302
			0.239982	0.770518
			-0.271097	-0.00836771
			0.561073	1.05269
			1.83264	0.806595
			1.0977	0.659609
			0.170921	0.377417
			T-test (paired, 2-tail)
			0.417817
