# Supplementary material for: Characterization of convergent thickening, a major convergence force producing morphogenic movement in amphibians
Source: eLife. 2022 Apr 11;11:e57642. doi: 10.7554/eLife.57642 (PMC9064293; doi:10.7554/eLife.57642)
Supplement: Figure 5—source data 1. [file elife-57642-fig5-data1.xlsx]

## Sheet: Sheet1
Figure 5C source data
	Wrapped Mesoderm (deep DIMZ + epithelium)
		time from 10 (h)	time SEM	IFT	IFT SEM	n
		-0.92	0.102421	0.27	0.0356371	5
		0.291111	0.064924	0.416667	0.052731	9
		1.575	0.121182	0.488333	0.118979	6
	Wrapped Ectoderm (deep AC + epithelium)
		time from 10 (h)	time SEM	IFT	IFT SEM	n
		-0.5525	0.159967	0.12	0.0248328	4
		0.568571	0.125858	0.105714	0.0221313	7
		1.71333	0.123704	0.102222	0.0161398	9
Figure 5F source data
	Naked Mesodeerm (deep DIMZ only)
		time from 10 (h)	time SEM	TST	TST SEM	n
		-1.54	0.0812404	0.288	0.068	5
		-0.361429	0.0878697	0.372857	0.0680586	7
		0.656	0.113075	0.324	0.0933059	5
		1.43	0.174614	0.692	0.07755	5
		2.275	0.0853913	0.8075	0.196527	4
	Naked Ectoderm (deep AC only)
		time from 10 (h)	time SEM	TST	TST SEM	n
		-1.35		0.09		1
		-0.35	0.0645497	0.22	0.106771	4
		0.564	0.148647	0.262	0.0344093	5
		1.395	0.199854	0.1425	0.0381608	4
		2.45	0.180278	0.206667	0.0290593	3
Figure 5G source data
	30 minute 'pushback' (force of thickening) measures
	Midpoint	Mesoderm (deep IMZ + epithelium)	Ectoderm (deep AC + epithelium)
	time from stage 10 (min)	Force Increease (uN)	Force Increease (uN)
	-79	0
	-66	0
	-47		0
	-44		0.03
	-17	0.13
	-16	0.37
	25	0.35
	42	0.66
	45	0.22
	68		0.01
	83	0.23
	93	0.26
	130	0.22
	131	0.21
	134	0.27
	160		0.07
	167		0
	178		0
	208		0
	232	0.32
		---	---
	average force increase (post 10- for IMZ)	0.294545	0.0157143
	SEM	0.0420252	0.00996593
Figure 5H source data
Wontons
	AC
time (h)	IFT (mN/m)	SEM	count
-0.64	0.0135	0.00416905	5
0.85	0.0073131	0.0055175	6
1.9	0.0116433	0.00262582	5
	DMZ
time (h)	IFT (mN/m)	SEM	count
-1.03333	0.00575	0.0015119	3
0.74375	0.0259004	0.00477829	8
2.1	0.0403968	0.0103437	6
Figure I source data
Deep agregates alone
		VMZ				DMZ
time form st. 10 (h)		TST (mN/m)	n	SEM		TST (mN/m)	n	SEM
-1.6		0.0206834	1			0.0218851	2	0.0025363
-1.00833		0.0312309	4	0.00492908		0.028432	4	0.00629721
-0.466667		0.0331465	5	0.00705206		0.027089	5	0.00562684		data in graph boxed
0.0277778		0.0384661	6	0.00859896		0.0259961	6	0.00363202
0.527778		0.041235	6	0.00696791		0.0287271	6	0.00258949
1.02778		0.0535062	5	0.0103879		0.0345896	6	0.00410373
1.52778		0.0684912	6	0.0113072		0.048761	6	0.010394
2.02778		0.0884681	6	0.0119125		0.0534951	6	0.00833996
2.53333		0.0894093	5	0.0215192		0.0563805	5	0.0144648
