# Supplementary material for: Characterization of convergent thickening, a major convergence force producing morphogenic movement in amphibians
Source: eLife. 2022 Apr 11;11:e57642. doi: 10.7554/eLife.57642 (PMC9064293; doi:10.7554/eLife.57642)
Supplement: Figure 6—source data 1. [file elife-57642-fig6-data1.xlsx]

## Sheet: Sheet1
Figure 6B source data
			Dorsal				Lateral				Ventral
	time (h)		Relative circumference	SEM	n		Relative circumference	SEM	n		Relative circumference	SEM	n
	-1.5		1				1				1
	-0.5		0.97669	0.0152495	3		1.00862	0.0189699	3		1.00476	0.00779564	3
	0.5		0.89695	0.0374611	3		1.00319	0.00899999	3		0.985756	0.0190276	3
	1.5		0.674446	0.0697798	4		0.880222	0.0324759	4		0.918814	0.0414517	4
	2.5		0.464128	0.0194319	3		0.517639	0.0508976	3		0.64824	0.0448186	4
		Ventralized
			entire circumference
	time		Relative circumference	SEM	n
	-0.04		1	0	5
	1.39		0.984724	0.00660016	5
	3.07		0.908913	0.018593	5
	4.75		0.771237	0.0323254	5
	6.41		0.541367	0.0928896	5
	8.07		0.239524	0.0540445	5
Figure 6C source data
			Ventralized BP Area					Ventralized IMZ Area
		Time(h)	relative area	SEM	n		Time(h)	relative area	SEM	n
		1.4	1		3		1.35	1		3
		2.3	0.866555	0.0160233	3		2.3	0.861792	0.0291616	3
		3.2	0.647667	0.0103635	3		3.2	0.751514	0.0178345	3
		4.66667	0.316625	0.0384103	3		4.83333	0.583072	0.0331541	3
		6.43333	0.0666078	0.0295724	3		6.43333	0.229764	0.0708891	3
		8.2	0.0248275	0.0104273	3		8.2	0.0198244	0.0805745	3
		means	Normal BP Area					Normal IMZ Area
		Time(h)	relative area	SEM	n		Time(h)	relative area	SEM	n
		0.365	1		3		0.31	1		3
		1.36667	0.796409	0.0638269	3		1.375	0.695585	0.0243119	3
		2.44333	0.488182	0.0314004	3		2.44	0.466609	0.0741538	3
		3.83333	0.220594	0.0162883	3		3.825	0.18194	0.0228336	3
		5.12333	0.0885321	0.0562764	3		5.135	0.0195606	0.00111324	3
