# Supplementary material for: Characterization of convergent thickening, a major convergence force producing morphogenic movement in amphibians
Source: eLife. 2022 Apr 11;11:e57642. doi: 10.7554/eLife.57642 (PMC9064293; doi:10.7554/eLife.57642)
Supplement: Figure 7—source data 1. [file elife-57642-fig7-data1.xlsx]

## Sheet: Sheet1
Figure 7B source data
		Expt1 7/10/05		Expt2 11/10/05			Expt3 13/10/05			Expt4 27/10/05							Exp 1	Exp 2	Exp 3	Exp 4				ttests (2-talied, unequal variance)
		closed	total	closed	total		closed	total		closed	total		mean	SEM	total n		Closure faction------------------------------------->
	Control	23	23	7	9		21	22		28	28		0.933081	0.0528647	82		1	0.777778	0.954545	1	Control			0.000405761	MHCIIB MO vs. controls
	MHC II B MO only	4	8	3	9		3	14		12	30		0.361905	0.0599508	61		0.5	0.333333	0.214286	0.4	MHC II B MO only			0.0289541	MHCIIB MO vs. UV ventralized
	UV only	33	33	4	9		20	23		24	25		0.818502	0.127635	90		1	0.444444	0.869565	0.96	UV only			0.453519	Control vs. UV ventralized
	UV + MHC II B MO	3	3	2	2		5	7		18	19		0.915414	0.0681807	31		1	1	0.714286	0.947368	UV + MHC II B MO			0.00094207	MHCIIB MO vs. MHCIIB MO + UV ventralized
																								0.535283	UV ventralied vs. MHCIIB MO + UV ventralized
																								0.844921	Cobntrol vs. MHCIIB MO + UV ventralized
