# Supplementary material for: Characterization of convergent thickening, a major convergence force producing morphogenic movement in amphibians
Source: eLife. 2022 Apr 11;11:e57642. doi: 10.7554/eLife.57642 (PMC9064293; doi:10.7554/eLife.57642)
Supplement: Figure 7—source data 2. [file elife-57642-fig7-data2.xlsx]

## Sheet: Sheet1
Figure 7C source data
	Normal										Ventralized
		relative area -------------------------------------------------->									time (h)	relative area -------------------------------------------------->
	time (h)	bro 1	bro 2	bro 3	bro 4	mean proportion	SEM				time	bro 1	bro 2	bro 3	bro 4	mean proportion	SEM
	-0.75	0.51	0.54	0.49	0.49	0.5075	0.0118145				2	0.56	0.56	0.51	0.41	0.51	0.0353553
	0.5	0.53	0.52	0.48	0.43	0.49	0.0227303				5.25	0.1	0.3	0.3	0.27	0.2425	0.0480234
	2.75	0.3	0.33	0.24	0.26	0.2825	0.0201556				8	0.03	0.05	0.08	0.09	0.0625	0.0137689
	5.25	0.08	0.07	0.04	0.03	0.055	0.0119024
	Normal + 0.5 ng DN Wnt										Ventralized + 0.5ng DN Wnt
		relative area -------------------------------------------------->									time (h)	relative area -------------------------------------------------->
	time (h)	bro 1	bro 2	bro 3	bro 4	mean proportion	SEM				time	bro 1	bro 2	bro 3	bro 4	mean proportion	SEM
	-0.75	0.41	0.59	0.62	0.56	0.545	0.0466369				2	0.51	0.52	0.48	0.43	0.485	0.0202073
	0.5	0.43	0.47	0.49	0.5	0.4725	0.0154785				5.25	0.28	0.36	0.33	0.28	0.3125	0.0197379
	2.75	0.32	0.43	0.42	0.52	0.4225	0.0409013				8	0.2	0.12	0.09	0.11	0.13	0.0241523
	5.25	0.25	0.38	0.35	0.41	0.3475	0.0347311
	8	0.28	0.26	0.38	0.45	0.3425	0.0444175						Ttest (2-tailed, equal variance)
													0.226264	Blastopore closure at 5.3h, Ventralized vs.Ventralized + DN Wnt
			Ttest (2-tailed, equal variance)										0.0513062	Blastopore closure at 8h, Ventralized vs.Ventralized + DN Wnt
			0.000208185	Blastopore closure at 5.3h, Normal vs. Normal + DN Wnt
