# Supplementary material for: Characterization of convergent thickening, a major convergence force producing morphogenic movement in amphibians
Source: eLife. 2022 Apr 11;11:e57642. doi: 10.7554/eLife.57642 (PMC9064293; doi:10.7554/eLife.57642)
Supplement: Source data 1. [file elife-57642-data1.xlsx]

## Sheet: 080520 V&D giants 1.results
Comparison of convergence rates before differential					Pre rate = from earliest observation through last time period of similar convergence
IMZ vs NIMZ convergence ('pre') to after ('post')					Post rate = from beginning of first time period of differential convergence through end of observation
	Times of evaluation periods				Convergence rates
	(hours from onset of gastrulation)				IMZ			NIMZ
explant	start pre	transition	end post		pre	post		pre	post
					(%/hr)	(%/hr)		(%/hr)	(%/hr)
080528 D180	-1.7	-1.25	0.25		10	13		7	0
080528 V giant	-1.5	-0.8	0.45		10	9		8	2
080522 D Giant		(-0.5)	0.45			10			2
080605 D225	-0.8	-0.35	0.65		13	16		9	-1
140220 Giant	-2	-0.5	0.5		7	6		5	-2
means	-1.5	-0.725	0.46		10	10.8		7.25	0.2
						T-tests( 2-tailed, unpaired)
						0.729434		0.115078	0.000508895
						IMZ pre vs. post		IMZ vs NIMZ pre	IMZ vs NIMZ post
									0.000547836
									NIMZ pre vs. post
